# Supplementary material for: Platelet endothelial aggregation receptor-1 regulates bovine muscle satellite cell migration and differentiation via integrin beta-1 and focal adhesion kinase
Source: Cell Adh Migr. 2019 May 27;13(1):192–202. doi: 10.1080/19336918.2019.1619434 (PMC6550786; doi:10.1080/19336918.2019.1619434)
Supplement: Supplemental Material [file kcam-13-01-1619434-s001.xlsx]

## Sheet: R20180500556_PEAR1
ProteinID	ProteinName	BP	MF	CC	GO_Term
F1MQ37	Myosin heavy chain 9	actin cytoskeleton reorganization [GO:0031532];actin filament-based movement [GO:0030048];actomyosin structure organization [GO:0031032];angiogenesis [GO:0001525];blood vessel endothelial cell migration [GO:0043534];cell-cell adhesion [GO:0098609];cytokinetic process [GO:0032506];establishment of meiotic spindle localization [GO:0051295];establishment of T cell polarity [GO:0001768];in utero embr…	actin filament binding [GO:0051015];actin-dependent ATPase activity [GO:0030898];ADP binding [GO:0043531];ATP binding [GO:0005524];microfilament motor activity [GO:0000146];microtubule binding [GO:0008017];microtubule motor activity [GO:0003777];protein domain specific binding [GO:0019904];protein homodimerization activity [GO:0042803];protein membrane anchor [GO:0043495]	actomyosin contractile ring [GO:0005826];brush border [GO:0005903];cell-cell adherens junction [GO:0005913];cleavage furrow [GO:0032154];COP9 signalosome [GO:0008180];cytosol [GO:0005829];focal adhesion [GO:0005925];immunological synapse [GO:0001772];integrin complex [GO:0008305];myosin II complex [GO:0016460];myosin II filament [GO:0097513];neuromuscular junction [GO:0031594];ruffle [GO:0001726]…	actin cytoskeleton reorganization [GO:0031532];actin filament-based movement [GO:0030048];actomyosin structure organization [GO:0031032];angiogenesis [GO:0001525];blood vessel endothelial cell migration [GO:0043534];cell-cell adhesion [GO:0098609];cytokinetic process [GO:0032506];establishment of meiotic spindle localization [GO:0051295];establishment of T cell polarity [GO:0001768];in utero embr…
L8J4S1	Myosin-9	microtubule-based movement [GO:0007018]	actin filament binding [GO:0051015];ATP binding [GO:0005524];microtubule binding [GO:0008017];microtubule motor activity [GO:0003777]	myosin complex [GO:0016459]	microtubule-based movement [GO:0007018];actin filament binding [GO:0051015];ATP binding [GO:0005524];microtubule binding [GO:0008017];microtubule motor activity [GO:0003777];myosin complex [GO:0016459]
L8ISP4	Serum albumin			extracellular space [GO:0005615]	extracellular space [GO:0005615]
L8IV96	Tropomyosin alpha-1 chain
Q5KR49	Tropomyosin alpha-1 chain	actin filament organization [GO:0007015];cardiac muscle contraction [GO:0060048]	actin filament binding [GO:0051015];disordered domain specific binding [GO:0097718];identical protein binding [GO:0042802];protein heterodimerization activity [GO:0046982];protein homodimerization activity [GO:0042803];structural constituent of muscle [GO:0008307]	actin cytoskeleton [GO:0015629];actin filament [GO:0005884];cardiac myofibril [GO:0097512];muscle thin filament tropomyosin [GO:0005862];myofibril [GO:0030016];sarcomere [GO:0030017]	actin filament organization [GO:0007015];cardiac muscle contraction [GO:0060048];actin filament binding [GO:0051015];disordered domain specific binding [GO:0097718];identical protein binding [GO:0042802];protein heterodimerization activity [GO:0046982];protein homodimerization activity [GO:0042803];structural constituent of muscle [GO:0008307];actin cytoskeleton [GO:0015629];actin filament [GO:00…
O02717	Non-muscle myosin heavy chain		motor activity [GO:0003774]	myosin complex [GO:0016459]	motor activity [GO:0003774];myosin complex [GO:0016459]
L8IRX0	Vimentin		structural molecule activity [GO:0005198]	intermediate filament [GO:0005882]	structural molecule activity [GO:0005198];intermediate filament [GO:0005882]
A4FV94	KRT6A protein		structural molecule activity [GO:0005198]	keratin filament [GO:0045095]	structural molecule activity [GO:0005198];keratin filament [GO:0045095]
P53712	Integrin beta-1	cell adhesion mediated by integrin [GO:0033627];cell-matrix adhesion [GO:0007160];cellular response to low-density lipoprotein particle stimulus [GO:0071404];integrin-mediated signaling pathway [GO:0007229];positive regulation of protein localization to plasma membrane [GO:1903078];receptor internalization [GO:0031623];regulation of collagen catabolic process [GO:0010710]	metal ion binding [GO:0046872];protein heterodimerization activity [GO:0046982];signaling receptor activity [GO:0038023];virus receptor activity [GO:0001618]	cell surface [GO:0009986];focal adhesion [GO:0005925];integrin complex [GO:0008305];invadopodium membrane [GO:0071438];lamellipodium [GO:0030027];melanosome [GO:0042470];membrane [GO:0016020];recycling endosome [GO:0055037];ruffle membrane [GO:0032587];sarcolemma [GO:0042383]	cell adhesion mediated by integrin [GO:0033627];cell-matrix adhesion [GO:0007160];cellular response to low-density lipoprotein particle stimulus [GO:0071404];integrin-mediated signaling pathway [GO:0007229];positive regulation of protein localization to plasma membrane [GO:1903078];receptor internalization [GO:0031623];regulation of collagen catabolic process [GO:0010710];metal ion binding [GO:00…
F1MUY2	Uncharacterized protein		structural molecule activity [GO:0005198]	keratin filament [GO:0045095]	structural molecule activity [GO:0005198];keratin filament [GO:0045095]
Q5KR48	Tropomyosin beta chain	actin filament organization [GO:0007015];muscle contraction [GO:0006936]	actin filament binding [GO:0051015];identical protein binding [GO:0042802];protein heterodimerization activity [GO:0046982];protein homodimerization activity [GO:0042803];structural constituent of muscle [GO:0008307]	actin cytoskeleton [GO:0015629];actin filament [GO:0005884];muscle thin filament tropomyosin [GO:0005862]	actin filament organization [GO:0007015];muscle contraction [GO:0006936];actin filament binding [GO:0051015];identical protein binding [GO:0042802];protein heterodimerization activity [GO:0046982];protein homodimerization activity [GO:0042803];structural constituent of muscle [GO:0008307];actin cytoskeleton [GO:0015629];actin filament [GO:0005884];muscle thin filament tropomyosin [GO:0005862]
L8HXK3	Myosin-10		actin binding [GO:0003779];ATP binding [GO:0005524];motor activity [GO:0003774]	myosin complex [GO:0016459]	actin binding [GO:0003779];ATP binding [GO:0005524];motor activity [GO:0003774];myosin complex [GO:0016459]
B5B0D4	Major allergen beta-lactoglobulin		small molecule binding [GO:0036094]		small molecule binding [GO:0036094]
A4IFP2	KRT4 protein	cytoskeleton organization [GO:0007010];epithelial cell differentiation [GO:0030855];negative regulation of epithelial cell proliferation [GO:0050680]	structural molecule activity [GO:0005198]	cell surface [GO:0009986];keratin filament [GO:0045095]	cytoskeleton organization [GO:0007010];epithelial cell differentiation [GO:0030855];negative regulation of epithelial cell proliferation [GO:0050680];structural molecule activity [GO:0005198];cell surface [GO:0009986];keratin filament [GO:0045095]
F1MMS9	Integrin alpha-3	cell adhesion [GO:0007155];dendritic spine maintenance [GO:0097062];exploration behavior [GO:0035640];integrin-mediated signaling pathway [GO:0007229];lung development [GO:0030324];memory [GO:0007613];mesodermal cell differentiation [GO:0048333];negative regulation of Rho protein signal transduction [GO:0035024];nephron development [GO:0072006];neuron migration [GO:0001764];positive regulation of…	metal ion binding [GO:0046872];protease binding [GO:0002020];protein heterodimerization activity [GO:0046982]	basolateral plasma membrane [GO:0016323];cell junction [GO:0030054];excitatory synapse [GO:0060076];external side of plasma membrane [GO:0009897];filopodium membrane [GO:0031527];integrin alpha3-beta1 complex [GO:0034667];invadopodium membrane [GO:0071438];synaptic membrane [GO:0097060]	cell adhesion [GO:0007155];dendritic spine maintenance [GO:0097062];exploration behavior [GO:0035640];integrin-mediated signaling pathway [GO:0007229];lung development [GO:0030324];memory [GO:0007613];mesodermal cell differentiation [GO:0048333];negative regulation of Rho protein signal transduction [GO:0035024];nephron development [GO:0072006];neuron migration [GO:0001764];positive regulation of…
Q5KR47	Tropomyosin alpha-3 chain	actin filament organization [GO:0007015];muscle contraction [GO:0006936]	actin filament binding [GO:0051015];structural constituent of muscle [GO:0008307]	actin filament [GO:0005884];cytosol [GO:0005829];muscle thin filament tropomyosin [GO:0005862];stress fiber [GO:0001725]	actin filament organization [GO:0007015];muscle contraction [GO:0006936];actin filament binding [GO:0051015];structural constituent of muscle [GO:0008307];actin filament [GO:0005884];cytosol [GO:0005829];muscle thin filament tropomyosin [GO:0005862];stress fiber [GO:0001725]
A6QR15	LOC535277 protein	actin filament organization [GO:0007015];muscle contraction [GO:0006936]	actin filament binding [GO:0051015];structural constituent of muscle [GO:0008307]	actin filament [GO:0005884];cortical cytoskeleton [GO:0030863];filamentous actin [GO:0031941];muscle thin filament tropomyosin [GO:0005862];podosome [GO:0002102]	actin filament organization [GO:0007015];muscle contraction [GO:0006936];actin filament binding [GO:0051015];structural constituent of muscle [GO:0008307];actin filament [GO:0005884];cortical cytoskeleton [GO:0030863];filamentous actin [GO:0031941];muscle thin filament tropomyosin [GO:0005862];podosome [GO:0002102]
L8J518	Actin, cytoplasmic 1		ATP binding [GO:0005524]		ATP binding [GO:0005524]
P02663	Alpha-S2-casein	defense response to bacterium [GO:0042742];response to 11-deoxycorticosterone [GO:1903496];response to dehydroepiandrosterone [GO:1903494];response to estradiol [GO:0032355];response to growth hormone [GO:0060416];response to progesterone [GO:0032570]	protein homodimerization activity [GO:0042803];zymogen binding [GO:0035375]	extracellular space [GO:0005615];Golgi apparatus [GO:0005794];Golgi lumen [GO:0005796]	defense response to bacterium [GO:0042742];response to 11-deoxycorticosterone [GO:1903496];response to dehydroepiandrosterone [GO:1903494];response to estradiol [GO:0032355];response to growth hormone [GO:0060416];response to progesterone [GO:0032570];protein homodimerization activity [GO:0042803];zymogen binding [GO:0035375];extracellular space [GO:0005615];Golgi apparatus [GO:0005794];Golgi lum…
E1BEB4	Fibulin 2	extracellular matrix organization [GO:0030198];positive regulation of cell-substrate adhesion [GO:0010811]	calcium ion binding [GO:0005509];extracellular matrix binding [GO:0050840]	extracellular matrix [GO:0031012]	extracellular matrix organization [GO:0030198];positive regulation of cell-substrate adhesion [GO:0010811];calcium ion binding [GO:0005509];extracellular matrix binding [GO:0050840];extracellular matrix [GO:0031012]
L8IGX9	Ribosomal protein L19	translation [GO:0006412]	structural constituent of ribosome [GO:0003735]	cytosolic large ribosomal subunit [GO:0022625]	translation [GO:0006412];structural constituent of ribosome [GO:0003735];cytosolic large ribosomal subunit [GO:0022625]
P10096	Glyceraldehyde-3-phosphate dehydrogenase	glucose metabolic process [GO:0006006];glycolytic process [GO:0006096];microtubule cytoskeleton organization [GO:0000226];neuron apoptotic process [GO:0051402];peptidyl-cysteine S-trans-nitrosylation [GO:0035606];protein stabilization [GO:0050821];regulation of translation [GO:0006417]	disordered domain specific binding [GO:0097718];glyceraldehyde-3-phosphate dehydrogenase (NAD+) (phosphorylating) activity [GO:0004365];microtubule binding [GO:0008017];NAD binding [GO:0051287];NADP binding [GO:0050661];peptidyl-cysteine S-nitrosylase activity [GO:0035605]	cytoplasm [GO:0005737];cytosol [GO:0005829];GAIT complex [GO:0097452];microtubule cytoskeleton [GO:0015630];nucleus [GO:0005634]	glucose metabolic process [GO:0006006];glycolytic process [GO:0006096];microtubule cytoskeleton organization [GO:0000226];neuron apoptotic process [GO:0051402];peptidyl-cysteine S-trans-nitrosylation [GO:0035606];protein stabilization [GO:0050821];regulation of translation [GO:0006417];disordered domain specific binding [GO:0097718];glyceraldehyde-3-phosphate dehydrogenase (NAD+) (phosphorylating…
E1BIL2	Uncharacterized protein		structural molecule activity [GO:0005198]	keratin filament [GO:0045095]	structural molecule activity [GO:0005198];keratin filament [GO:0045095]
P02662	Alpha-S1-casein	negative regulation of apoptotic process [GO:0043066];negative regulation of gene expression [GO:0010629];negative regulation of supramolecular fiber organization [GO:1902904];positive regulation of androst-4-ene-3,17-dione biosynthetic process [GO:1903456];positive regulation of androstenedione secretion [GO:2000839];positive regulation of progesterone biosynthetic process [GO:2000184];positive …	amyloid-beta binding [GO:0001540];antioxidant activity [GO:0016209]	extracellular space [GO:0005615];Golgi apparatus [GO:0005794];Golgi lumen [GO:0005796]	negative regulation of apoptotic process [GO:0043066];negative regulation of gene expression [GO:0010629];negative regulation of supramolecular fiber organization [GO:1902904];positive regulation of androst-4-ene-3,17-dione biosynthetic process [GO:1903456];positive regulation of androstenedione secretion [GO:2000839];positive regulation of progesterone biosynthetic process [GO:2000184];positive …
F1MYM9	Myosin heavy chain 11	cardiac muscle fiber development [GO:0048739];elastic fiber assembly [GO:0048251];microtubule-based movement [GO:0007018]	actin filament binding [GO:0051015];ATP binding [GO:0005524];microtubule binding [GO:0008017];microtubule motor activity [GO:0003777];structural constituent of muscle [GO:0008307]	myosin complex [GO:0016459]	cardiac muscle fiber development [GO:0048739];elastic fiber assembly [GO:0048251];microtubule-based movement [GO:0007018];actin filament binding [GO:0051015];ATP binding [GO:0005524];microtubule binding [GO:0008017];microtubule motor activity [GO:0003777];structural constituent of muscle [GO:0008307];myosin complex [GO:0016459]
F1MT41	Prostaglandin F2 receptor inhibitor	lipid particle organization [GO:0034389]		integral component of membrane [GO:0016021];plasma membrane [GO:0005886]	lipid particle organization [GO:0034389];integral component of membrane [GO:0016021];plasma membrane [GO:0005886]
F1MTN1	Integrin beta	apoptotic cell clearance [GO:0043277];cell-matrix adhesion [GO:0007160];cell-substrate junction assembly [GO:0007044];cellular response to platelet-derived growth factor stimulus [GO:0036120];integrin-mediated signaling pathway [GO:0007229];platelet aggregation [GO:0070527];platelet-derived growth factor receptor signaling pathway [GO:0048008];positive regulation of cell-matrix adhesion [GO:00019…	integrin binding [GO:0005178];protein kinase C binding [GO:0005080]	alpha9-beta1 integrin-ADAM8 complex [GO:0071133];alphav-beta3 integrin-PKCalpha complex [GO:0035866];apical plasma membrane [GO:0016324];external side of plasma membrane [GO:0009897];integrin complex [GO:0008305]	apoptotic cell clearance [GO:0043277];cell-matrix adhesion [GO:0007160];cell-substrate junction assembly [GO:0007044];cellular response to platelet-derived growth factor stimulus [GO:0036120];integrin-mediated signaling pathway [GO:0007229];platelet aggregation [GO:0070527];platelet-derived growth factor receptor signaling pathway [GO:0048008];positive regulation of cell-matrix adhesion [GO:00019…
Q9TSN6	Alpha-lactalbumin	defense response to bacterium [GO:0042742];lactose biosynthetic process [GO:0005989]	calcium ion binding [GO:0005509];lactose synthase activity [GO:0004461]	extracellular region [GO:0005576]	defense response to bacterium [GO:0042742];lactose biosynthetic process [GO:0005989];calcium ion binding [GO:0005509];lactose synthase activity [GO:0004461];extracellular region [GO:0005576]
Q3ZBH3	CD151 antigen	cell surface receptor signaling pathway [GO:0007166]	integrin binding [GO:0005178]	integral component of plasma membrane [GO:0005887]	cell surface receptor signaling pathway [GO:0007166];integrin binding [GO:0005178];integral component of plasma membrane [GO:0005887]
E1B9F6	Elongation factor 1-alpha		GTP binding [GO:0005525];GTPase activity [GO:0003924];translation elongation factor activity [GO:0003746]	cytoplasm [GO:0005737]	GTP binding [GO:0005525];GTPase activity [GO:0003924];translation elongation factor activity [GO:0003746];cytoplasm [GO:0005737]
L8INI1	60S ribosomal protein L4	translation [GO:0006412]	structural constituent of ribosome [GO:0003735]	ribosome [GO:0005840]	translation [GO:0006412];structural constituent of ribosome [GO:0003735];ribosome [GO:0005840]
Q3SZG7	60S ribosomal protein L13	translation [GO:0006412]	structural constituent of ribosome [GO:0003735]	ribosome [GO:0005840]	translation [GO:0006412];structural constituent of ribosome [GO:0003735];ribosome [GO:0005840]
L8IJB4	60S ribosomal protein L18	translation [GO:0006412]	structural constituent of ribosome [GO:0003735]	ribosome [GO:0005840]	translation [GO:0006412];structural constituent of ribosome [GO:0003735];ribosome [GO:0005840]
A4ZZF8	Alpha-actinin 1	actin crosslink formation [GO:0051764];actin filament bundle assembly [GO:0051017];sarcomere organization [GO:0045214];skeletal muscle fiber development [GO:0048741]	actin filament binding [GO:0051015];alpha-actinin binding [GO:0051393];calcium ion binding [GO:0005509];protein homodimerization activity [GO:0042803];vinculin binding [GO:0017166]	bicellular tight junction [GO:0005923];cell leading edge [GO:0031252];dense body [GO:0097433];focal adhesion [GO:0005925];inner dense plaque of desmosome [GO:0090637];lamellipodium [GO:0030027];lateral plasma membrane [GO:0016328];outer dense plaque of desmosome [GO:0090636];sarcolemma [GO:0042383];smooth muscle dense body [GO:0030486];stress fiber [GO:0001725];terminal web [GO:1990357];zonula ad…	actin crosslink formation [GO:0051764];actin filament bundle assembly [GO:0051017];sarcomere organization [GO:0045214];skeletal muscle fiber development [GO:0048741];actin filament binding [GO:0051015];alpha-actinin binding [GO:0051393];calcium ion binding [GO:0005509];protein homodimerization activity [GO:0042803];vinculin binding [GO:0017166];bicellular tight junction [GO:0005923];cell leading …
A6H7J7	Uncharacterized protein
Q28115	Glial fibrillary acidic protein	astrocyte development [GO:0014002];Bergmann glial cell differentiation [GO:0060020];extracellular matrix organization [GO:0030198];intermediate filament organization [GO:0045109];long-term synaptic potentiation [GO:0060291];negative regulation of neuron projection development [GO:0010977];neuron projection regeneration [GO:0031102];positive regulation of Schwann cell proliferation [GO:0010625];re…	identical protein binding [GO:0042802];structural molecule activity [GO:0005198]	astrocyte end-foot [GO:0097450];cell body [GO:0044297];cytoplasm [GO:0005737];intermediate filament [GO:0005882];membrane [GO:0016020];myelin sheath [GO:0043209]	astrocyte development [GO:0014002];Bergmann glial cell differentiation [GO:0060020];extracellular matrix organization [GO:0030198];intermediate filament organization [GO:0045109];long-term synaptic potentiation [GO:0060291];negative regulation of neuron projection development [GO:0010977];neuron projection regeneration [GO:0031102];positive regulation of Schwann cell proliferation [GO:0010625];re…
F1MSQ6	Neurofilament heavy	cellular response to leukemia inhibitory factor [GO:1990830];microtubule cytoskeleton organization [GO:0000226];neurofilament bundle assembly [GO:0033693];neurofilament cytoskeleton organization [GO:0060052];nucleosome assembly [GO:0006334];peripheral nervous system neuron axonogenesis [GO:0048936];regulation of organelle transport along microtubule [GO:1902513]	DNA binding [GO:0003677];protein kinase binding [GO:0019901];structural molecule activity [GO:0005198]	axon [GO:0030424];myelin sheath [GO:0043209];neurofibrillary tangle [GO:0097418];neurofilament [GO:0005883];nucleosome [GO:0000786];postsynaptic density [GO:0014069]	cellular response to leukemia inhibitory factor [GO:1990830];microtubule cytoskeleton organization [GO:0000226];neurofilament bundle assembly [GO:0033693];neurofilament cytoskeleton organization [GO:0060052];nucleosome assembly [GO:0006334];peripheral nervous system neuron axonogenesis [GO:0048936];regulation of organelle transport along microtubule [GO:1902513];DNA binding [GO:0003677];protein k…
F1MCF8	Uncharacterized protein	immune response [GO:0006955];immunoglobulin production [GO:0002377]		extracellular space [GO:0005615]	immune response [GO:0006955];immunoglobulin production [GO:0002377];extracellular space [GO:0005615]
Q58DW3	60S ribosomal protein L29	cytoplasmic translation [GO:0002181]	structural constituent of ribosome [GO:0003735]	cytosolic large ribosomal subunit [GO:0022625]	cytoplasmic translation [GO:0002181];structural constituent of ribosome [GO:0003735];cytosolic large ribosomal subunit [GO:0022625]
F1MZ92	Nuclease-sensitive element-binding protein 1	CRD-mediated mRNA stabilization [GO:0070934];in utero embryonic development [GO:0001701];negative regulation of striated muscle cell differentiation [GO:0051154];negative regulation of transcription by RNA polymerase II [GO:0000122];protein localization to cytoplasmic stress granule [GO:1903608]	chromatin binding [GO:0003682];GTPase binding [GO:0051020];RNA binding [GO:0003723];RNA polymerase II proximal promoter sequence-specific DNA binding [GO:0000978];single-stranded DNA binding [GO:0003697];transcriptional activator activity, RNA polymerase II proximal promoter sequence-specific DNA binding [GO:0001077]	CRD-mediated mRNA stability complex [GO:0070937];cytoplasmic stress granule [GO:0010494];cytosol [GO:0005829];histone pre-mRNA 3'end processing complex [GO:0071204];nuclear membrane [GO:0031965];U12-type spliceosomal complex [GO:0005689]	CRD-mediated mRNA stabilization [GO:0070934];in utero embryonic development [GO:0001701];negative regulation of striated muscle cell differentiation [GO:0051154];negative regulation of transcription by RNA polymerase II [GO:0000122];protein localization to cytoplasmic stress granule [GO:1903608];chromatin binding [GO:0003682];GTPase binding [GO:0051020];RNA binding [GO:0003723];RNA polymerase II …
A5D984	Pyruvate kinase	cellular response to insulin stimulus [GO:0032869];glycolytic process [GO:0006096];programmed cell death [GO:0012501]	kinase activity [GO:0016301];magnesium ion binding [GO:0000287];potassium ion binding [GO:0030955];pyruvate kinase activity [GO:0004743]	cilium [GO:0005929];cytoplasm [GO:0005737];cytosol [GO:0005829];myelin sheath [GO:0043209];nucleus [GO:0005634]	cellular response to insulin stimulus [GO:0032869];glycolytic process [GO:0006096];programmed cell death [GO:0012501];kinase activity [GO:0016301];magnesium ion binding [GO:0000287];potassium ion binding [GO:0030955];pyruvate kinase activity [GO:0004743];cilium [GO:0005929];cytoplasm [GO:0005737];cytosol [GO:0005829];myelin sheath [GO:0043209];nucleus [GO:0005634]
F1N1A9	Integrin alpha-V	angiogenesis [GO:0001525];apolipoprotein A-I-mediated signaling pathway [GO:0038027];apoptotic cell clearance [GO:0043277];cell adhesion mediated by integrin [GO:0033627];cell-matrix adhesion [GO:0007160];endodermal cell differentiation [GO:0035987];ERK1 and ERK2 cascade [GO:0070371];extrinsic apoptotic signaling pathway in absence of ligand [GO:0097192];heterotypic cell-cell adhesion [GO:0034113…	C-X3-C chemokine binding [GO:0019960];extracellular matrix binding [GO:0050840];extracellular matrix protein binding [GO:1990430];fibroblast growth factor binding [GO:0017134];fibronectin binding [GO:0001968];insulin-like growth factor I binding [GO:0031994];integrin binding [GO:0005178];neuregulin binding [GO:0038132];opsonin binding [GO:0001846];protease binding [GO:0002020];protein kinase C bi…	alphav-beta3 integrin-HMGB1 complex [GO:0035868];alphav-beta3 integrin-IGF-1-IGF1R complex [GO:0035867];cytosol [GO:0005829];external side of plasma membrane [GO:0009897];filopodium membrane [GO:0031527];focal adhesion [GO:0005925];integrin alphav-beta3 complex [GO:0034683];integrin alphav-beta5 complex [GO:0034684];integrin alphav-beta6 complex [GO:0034685];integrin alphav-beta8 complex [GO:0034…	angiogenesis [GO:0001525];apolipoprotein A-I-mediated signaling pathway [GO:0038027];apoptotic cell clearance [GO:0043277];cell adhesion mediated by integrin [GO:0033627];cell-matrix adhesion [GO:0007160];endodermal cell differentiation [GO:0035987];ERK1 and ERK2 cascade [GO:0070371];extrinsic apoptotic signaling pathway in absence of ligand [GO:0097192];heterotypic cell-cell adhesion [GO:0034113…
A0A1U9XAQ0	Beta-casein			extracellular region [GO:0005576]	extracellular region [GO:0005576]
A6QPP9	C-X-C motif chemokine	defense response [GO:0006952];immune response [GO:0006955];leukocyte chemotaxis [GO:0030595];platelet activation [GO:0030168]	chemokine activity [GO:0008009];heparin binding [GO:0008201]	extracellular space [GO:0005615]	defense response [GO:0006952];immune response [GO:0006955];leukocyte chemotaxis [GO:0030595];platelet activation [GO:0030168];chemokine activity [GO:0008009];heparin binding [GO:0008201];extracellular space [GO:0005615]
Q9TRB9	Enterotoxin-binding glycoprotein PP20K
A5PK75	Torsin	cell adhesion [GO:0007155];chaperone cofactor-dependent protein refolding [GO:0051085];chaperone-mediated protein transport [GO:0072321];ER-associated misfolded protein catabolic process [GO:0071712];intermediate filament cytoskeleton organization [GO:0045104];neuron projection development [GO:0031175];nuclear membrane organization [GO:0071763];positive regulation of synaptic vesicle endocytosis …	ATP binding [GO:0005524];ATPase activity [GO:0016887];kinesin binding [GO:0019894];misfolded protein binding [GO:0051787];unfolded protein binding [GO:0051082]	endoplasmic reticulum lumen [GO:0005788];extrinsic component of endoplasmic reticulum membrane [GO:0042406];nuclear membrane [GO:0031965];synaptic vesicle [GO:0008021]	cell adhesion [GO:0007155];chaperone cofactor-dependent protein refolding [GO:0051085];chaperone-mediated protein transport [GO:0072321];ER-associated misfolded protein catabolic process [GO:0071712];intermediate filament cytoskeleton organization [GO:0045104];neuron projection development [GO:0031175];nuclear membrane organization [GO:0071763];positive regulation of synaptic vesicle endocytosis …
E1B729	Sulfotransferase		[heparan sulfate]-glucosamine 3-sulfotransferase 1 activity [GO:0008467]		[heparan sulfate]-glucosamine 3-sulfotransferase 1 activity [GO:0008467]
F1MQI3	Nebulin		actin binding [GO:0003779]	Z disc [GO:0030018]	actin binding [GO:0003779];Z disc [GO:0030018]
L8HPF5	Ig gamma-1 chain C region
L8ID14	Sarcolemmal membrane-associated protein	muscle contraction [GO:0006936]		integral component of membrane [GO:0016021]	muscle contraction [GO:0006936];integral component of membrane [GO:0016021]
F1MMV0	Inhibitor of Bruton tyrosine kinase	release of sequestered calcium ion into cytosol [GO:0051209]	protein kinase binding [GO:0019901];protein tyrosine kinase inhibitor activity [GO:0030292]	cytoplasm [GO:0005737];nucleoplasm [GO:0005654]	release of sequestered calcium ion into cytosol [GO:0051209];protein kinase binding [GO:0019901];protein tyrosine kinase inhibitor activity [GO:0030292];cytoplasm [GO:0005737];nucleoplasm [GO:0005654]
G5E513	Uncharacterized protein	B cell receptor signaling pathway [GO:0050853];complement activation, classical pathway [GO:0006958];defense response to bacterium [GO:0042742];innate immune response [GO:0045087];phagocytosis, engulfment [GO:0006911];phagocytosis, recognition [GO:0006910];positive regulation of B cell activation [GO:0050871]	antigen binding [GO:0003823];immunoglobulin receptor binding [GO:0034987]	blood microparticle [GO:0072562];external side of plasma membrane [GO:0009897];immunoglobulin complex, circulating [GO:0042571]	B cell receptor signaling pathway [GO:0050853];complement activation, classical pathway [GO:0006958];defense response to bacterium [GO:0042742];innate immune response [GO:0045087];phagocytosis, engulfment [GO:0006911];phagocytosis, recognition [GO:0006910];positive regulation of B cell activation [GO:0050871];antigen binding [GO:0003823];immunoglobulin receptor binding [GO:0034987];blood micropar…
P15497	Apolipoprotein A-I	adrenal gland development [GO:0030325];blood vessel endothelial cell migration [GO:0043534];cholesterol biosynthetic process [GO:0006695];cholesterol efflux [GO:0033344];cholesterol homeostasis [GO:0042632];cholesterol import [GO:0070508];endothelial cell proliferation [GO:0001935];G-protein coupled receptor signaling pathway [GO:0007186];glucocorticoid metabolic process [GO:0008211];high-density…	amyloid-beta binding [GO:0001540];apolipoprotein A-I receptor binding [GO:0034191];chemorepellent activity [GO:0045499];cholesterol binding [GO:0015485];cholesterol transporter activity [GO:0017127];enzyme binding [GO:0019899];heat shock protein binding [GO:0031072];high-density lipoprotein particle binding [GO:0008035];high-density lipoprotein particle receptor binding [GO:0070653];identical pro…	blood microparticle [GO:0072562];chylomicron [GO:0042627];endocytic vesicle [GO:0030139];high-density lipoprotein particle [GO:0034364];spherical high-density lipoprotein particle [GO:0034366];very-low-density lipoprotein particle [GO:0034361]	adrenal gland development [GO:0030325];blood vessel endothelial cell migration [GO:0043534];cholesterol biosynthetic process [GO:0006695];cholesterol efflux [GO:0033344];cholesterol homeostasis [GO:0042632];cholesterol import [GO:0070508];endothelial cell proliferation [GO:0001935];G-protein coupled receptor signaling pathway [GO:0007186];glucocorticoid metabolic process [GO:0008211];high-density…
E1BGE2	UTP20, small subunit processome component	maturation of SSU-rRNA from tricistronic rRNA transcript (SSU-rRNA, 5.8S rRNA, LSU-rRNA) [GO:0000462]		90S preribosome [GO:0030686];nucleolus [GO:0005730];plasma membrane [GO:0005886];small-subunit processome [GO:0032040]	maturation of SSU-rRNA from tricistronic rRNA transcript (SSU-rRNA, 5.8S rRNA, LSU-rRNA) [GO:0000462];90S preribosome [GO:0030686];nucleolus [GO:0005730];plasma membrane [GO:0005886];small-subunit processome [GO:0032040]
E1BKZ0	Pericentrin	cilium assembly [GO:0060271];mitotic spindle organization [GO:0007052];positive regulation of intracellular protein transport [GO:0090316];signal transduction [GO:0007165]	protein-containing complex scaffold activity [GO:0032947]	centriolar satellite [GO:0034451];centriole [GO:0005814];cytosol [GO:0005829]	cilium assembly [GO:0060271];mitotic spindle organization [GO:0007052];positive regulation of intracellular protein transport [GO:0090316];signal transduction [GO:0007165];protein-containing complex scaffold activity [GO:0032947];centriolar satellite [GO:0034451];centriole [GO:0005814];cytosol [GO:0005829]
F1MB08	Alpha-enolase	glycolytic process [GO:0006096]	magnesium ion binding [GO:0000287];phosphopyruvate hydratase activity [GO:0004634]	phosphopyruvate hydratase complex [GO:0000015];plasma membrane [GO:0005886]	glycolytic process [GO:0006096];magnesium ion binding [GO:0000287];phosphopyruvate hydratase activity [GO:0004634];phosphopyruvate hydratase complex [GO:0000015];plasma membrane [GO:0005886]
L8HMX7	Guanine nucleotide-binding protein G(S) subunit alpha isoforms XLas	G-protein coupled receptor signaling pathway [GO:0007186]	G-protein beta/gamma-subunit complex binding [GO:0031683];GTP binding [GO:0005525];GTPase activity [GO:0003924];signal transducer activity [GO:0004871]		G-protein coupled receptor signaling pathway [GO:0007186];G-protein beta/gamma-subunit complex binding [GO:0031683];GTP binding [GO:0005525];GTPase activity [GO:0003924];signal transducer activity [GO:0004871]
L8IHB9	Tubulin alpha chain	microtubule-based process [GO:0007017]	GTP binding [GO:0005525];GTPase activity [GO:0003924];structural constituent of cytoskeleton [GO:0005200]	microtubule [GO:0005874]	microtubule-based process [GO:0007017];GTP binding [GO:0005525];GTPase activity [GO:0003924];structural constituent of cytoskeleton [GO:0005200];microtubule [GO:0005874]
P01030	Complement C4	complement activation, classical pathway [GO:0006958];inflammatory response [GO:0006954];innate immune response [GO:0045087]		axon [GO:0030424];cell junction [GO:0030054];dendrite [GO:0030425];extracellular space [GO:0005615];synapse [GO:0045202]	complement activation, classical pathway [GO:0006958];inflammatory response [GO:0006954];innate immune response [GO:0045087];axon [GO:0030424];cell junction [GO:0030054];dendrite [GO:0030425];extracellular space [GO:0005615];synapse [GO:0045202]
Q3T0S6	60S ribosomal protein L8	cytoplasmic translation [GO:0002181]	RNA binding [GO:0003723];rRNA binding [GO:0019843];structural constituent of ribosome [GO:0003735]	cytosolic large ribosomal subunit [GO:0022625];polysomal ribosome [GO:0042788]	cytoplasmic translation [GO:0002181];RNA binding [GO:0003723];rRNA binding [GO:0019843];structural constituent of ribosome [GO:0003735];cytosolic large ribosomal subunit [GO:0022625];polysomal ribosome [GO:0042788]
A0A0M4MD57	Haptoglobin		serine-type endopeptidase activity [GO:0004252]		serine-type endopeptidase activity [GO:0004252]
B6CXY5	Kappa casein	protein homooligomerization [GO:0051260];response to 11-deoxycorticosterone [GO:1903496];response to dehydroepiandrosterone [GO:1903494];response to estradiol [GO:0032355];response to progesterone [GO:0032570]	zymogen binding [GO:0035375]	extracellular space [GO:0005615];Golgi apparatus [GO:0005794];Golgi lumen [GO:0005796]	protein homooligomerization [GO:0051260];response to 11-deoxycorticosterone [GO:1903496];response to dehydroepiandrosterone [GO:1903494];response to estradiol [GO:0032355];response to progesterone [GO:0032570];zymogen binding [GO:0035375];extracellular space [GO:0005615];Golgi apparatus [GO:0005794];Golgi lumen [GO:0005796]
E1BCC0	Family with sequence similarity 186 member A
E1BJH3	Centriolin	cell division [GO:0051301];mitotic cell cycle [GO:0000278]		centriolar subdistal appendage [GO:0120103];centrosome [GO:0005813];cytosol [GO:0005829]	cell division [GO:0051301];mitotic cell cycle [GO:0000278];centriolar subdistal appendage [GO:0120103];centrosome [GO:0005813];cytosol [GO:0005829]
F1MJH1	Gelsolin	actin filament severing [GO:0051014];actin nucleation [GO:0045010];barbed-end actin filament capping [GO:0051016]	actin filament binding [GO:0051015];calcium ion binding [GO:0005509]		actin filament severing [GO:0051014];actin nucleation [GO:0045010];barbed-end actin filament capping [GO:0051016];actin filament binding [GO:0051015];calcium ion binding [GO:0005509]
G3MZE5	Uncharacterized protein	mRNA export from nucleus [GO:0006406]	mRNA binding [GO:0003729]	THO complex part of transcription export complex [GO:0000445]	mRNA export from nucleus [GO:0006406];mRNA binding [GO:0003729];THO complex part of transcription export complex [GO:0000445]
G5E5D5	Uncharacterized protein			mitochondrion [GO:0005739]	mitochondrion [GO:0005739]
L8IEN9	Serine/arginine-rich splicing factor 11	RNA splicing [GO:0008380]	RNA binding [GO:0003723]		RNA splicing [GO:0008380];RNA binding [GO:0003723]
L8IRL2	SLAM family member 9			integral component of membrane [GO:0016021]	integral component of membrane [GO:0016021]
E1BGX8	HHIP like 2		catalytic activity [GO:0003824]		catalytic activity [GO:0003824]
L8IEZ4	Nuclear receptor coactivator 5
F1MPJ3	Ventricular zone expressed PH domain containing 1
Q5E9U4	tRNA wybutosine-synthesizing protein 3 homolog	tRNA processing [GO:0008033]	methyltransferase activity [GO:0008168]		tRNA processing [GO:0008033];methyltransferase activity [GO:0008168]
L8IGK0	Transmembrane protease serine 13		scavenger receptor activity [GO:0005044];serine-type endopeptidase activity [GO:0004252]	integral component of membrane [GO:0016021]	scavenger receptor activity [GO:0005044];serine-type endopeptidase activity [GO:0004252];integral component of membrane [GO:0016021]
E1B7E3	Golgin A4	Golgi to plasma membrane protein transport [GO:0043001];positive regulation of axon extension [GO:0045773]	GTPase binding [GO:0051020]	cytosol [GO:0005829];Golgi apparatus [GO:0005794]	Golgi to plasma membrane protein transport [GO:0043001];positive regulation of axon extension [GO:0045773];GTPase binding [GO:0051020];cytosol [GO:0005829];Golgi apparatus [GO:0005794]
F1N4J6	Phosphodiesterase	signal transduction [GO:0007165]	3',5'-cyclic-nucleotide phosphodiesterase activity [GO:0004114];metal ion binding [GO:0046872]		signal transduction [GO:0007165];3',5'-cyclic-nucleotide phosphodiesterase activity [GO:0004114];metal ion binding [GO:0046872]
G5E6T2	Rho GTPase activating protein 23	positive regulation of GTPase activity [GO:0043547];signal transduction [GO:0007165]	GTPase activator activity [GO:0005096]		positive regulation of GTPase activity [GO:0043547];signal transduction [GO:0007165];GTPase activator activity [GO:0005096]
Q17QF4	5'-nucleotidase, cytosolic III-like		5'-nucleotidase activity [GO:0008253];magnesium ion binding [GO:0000287]	cytoplasm [GO:0005737]	5'-nucleotidase activity [GO:0008253];magnesium ion binding [GO:0000287];cytoplasm [GO:0005737]
F1N5D7	Solute carrier family 9 member C2 (putative)	potassium ion transmembrane transport [GO:0071805];regulation of intracellular pH [GO:0051453];sodium ion import across plasma membrane [GO:0098719]	potassium [GO:0015386];sodium [GO:0015385]	integral component of membrane [GO:0016021];plasma membrane [GO:0005886]	potassium ion transmembrane transport [GO:0071805];regulation of intracellular pH [GO:0051453];sodium ion import across plasma membrane [GO:0098719];potassium [GO:0015386];sodium [GO:0015385];integral component of membrane [GO:0016021];plasma membrane [GO:0005886]
L8HMT1	DNA (cytosine-5)-methyltransferase		chromatin binding [GO:0003682];DNA (cytosine-5-)-methyltransferase activity [GO:0003886];DNA binding [GO:0003677];zinc ion binding [GO:0008270]	nucleus [GO:0005634]	chromatin binding [GO:0003682];DNA (cytosine-5-)-methyltransferase activity [GO:0003886];DNA binding [GO:0003677];zinc ion binding [GO:0008270];nucleus [GO:0005634]
L8I3P1	Putative ATP-dependent RNA helicase DDX41		ATP binding [GO:0005524];helicase activity [GO:0004386];nucleic acid binding [GO:0003676]		ATP binding [GO:0005524];helicase activity [GO:0004386];nucleic acid binding [GO:0003676]
L8IAY2	Lys-63-specific deubiquitinase BRCC36	DNA repair [GO:0006281];protein K63-linked deubiquitination [GO:0070536]	thiol-dependent ubiquitin-specific protease activity [GO:0004843]	BRCA1-A complex [GO:0070531];BRISC complex [GO:0070552]	DNA repair [GO:0006281];protein K63-linked deubiquitination [GO:0070536];thiol-dependent ubiquitin-specific protease activity [GO:0004843];BRCA1-A complex [GO:0070531];BRISC complex [GO:0070552]
L8INE4	Serine/threonine-protein kinase DCLK1		ATP binding [GO:0005524];protein serine/threonine kinase activity [GO:0004674]		ATP binding [GO:0005524];protein serine/threonine kinase activity [GO:0004674]
Q95L48	Vasopressin V1b receptor		vasopressin receptor activity [GO:0005000]	integral component of membrane [GO:0016021]	vasopressin receptor activity [GO:0005000];integral component of membrane [GO:0016021]
Q58DM7	Oxidoreductase NAD-binding domain-containing protein 1		oxidoreductase activity [GO:0016491]	mitochondrion [GO:0005739]	oxidoreductase activity [GO:0016491];mitochondrion [GO:0005739]
A6QQV4	METTL3 protein		mRNA (2'-O-methyladenosine-N6-)-methyltransferase activity [GO:0016422]	nucleus [GO:0005634]	mRNA (2'-O-methyladenosine-N6-)-methyltransferase activity [GO:0016422];nucleus [GO:0005634]
E1BNN6	NLR family pyrin domain containing 1	activation of cysteine-type endopeptidase activity involved in apoptotic process [GO:0006919];inflammatory response [GO:0006954];innate immune response [GO:0045087];neuron apoptotic process [GO:0051402];NLRP1 inflammasome complex assembly [GO:1904784]	ATP binding [GO:0005524];enzyme binding [GO:0019899];protein domain specific binding [GO:0019904]	NLRP1 inflammasome complex [GO:0072558];nucleoplasm [GO:0005654]	activation of cysteine-type endopeptidase activity involved in apoptotic process [GO:0006919];inflammatory response [GO:0006954];innate immune response [GO:0045087];neuron apoptotic process [GO:0051402];NLRP1 inflammasome complex assembly [GO:1904784];ATP binding [GO:0005524];enzyme binding [GO:0019899];protein domain specific binding [GO:0019904];NLRP1 inflammasome complex [GO:0072558];nucleopla…
E1BPT6	RNA binding motif single stranded interacting protein 3	defense response to tumor cell [GO:0002357];negative regulation of canonical Wnt signaling pathway [GO:0090090];negative regulation of gene expression [GO:0010629];positive regulation of translation [GO:0045727]	mRNA 3'-UTR AU-rich region binding [GO:0035925];poly(A) binding [GO:0008143];poly(U) RNA binding [GO:0008266]	cytoplasm [GO:0005737]	defense response to tumor cell [GO:0002357];negative regulation of canonical Wnt signaling pathway [GO:0090090];negative regulation of gene expression [GO:0010629];positive regulation of translation [GO:0045727];mRNA 3'-UTR AU-rich region binding [GO:0035925];poly(A) binding [GO:0008143];poly(U) RNA binding [GO:0008266];cytoplasm [GO:0005737]
F1MC27	Lemur tyrosine kinase 3		ATP binding [GO:0005524];protein kinase activity [GO:0004672]	integral component of membrane [GO:0016021]	ATP binding [GO:0005524];protein kinase activity [GO:0004672];integral component of membrane [GO:0016021]
F1MCK2	AHNAK nucleoprotein	protein complex oligomerization [GO:0051259];regulation of RNA splicing [GO:0043484];regulation of voltage-gated calcium channel activity [GO:1901385]	S100 protein binding [GO:0044548];structural molecule activity conferring elasticity [GO:0097493]	actin cytoskeleton [GO:0015629];cell-cell contact zone [GO:0044291];costamere [GO:0043034];cytosol [GO:0005829];extracellular exosome [GO:0070062];membrane raft [GO:0045121];nucleus [GO:0005634];sarcolemma [GO:0042383]	protein complex oligomerization [GO:0051259];regulation of RNA splicing [GO:0043484];regulation of voltage-gated calcium channel activity [GO:1901385];S100 protein binding [GO:0044548];structural molecule activity conferring elasticity [GO:0097493];actin cytoskeleton [GO:0015629];cell-cell contact zone [GO:0044291];costamere [GO:0043034];cytosol [GO:0005829];extracellular exosome [GO:0070062];mem…
F1N5W6	Hexosyltransferase	protein glycosylation [GO:0006486]	galactosyltransferase activity [GO:0008378]	Golgi membrane [GO:0000139];integral component of membrane [GO:0016021]	protein glycosylation [GO:0006486];galactosyltransferase activity [GO:0008378];Golgi membrane [GO:0000139];integral component of membrane [GO:0016021]
F6QMU7	Histone deacetylase	regulation of gene expression, epigenetic [GO:0040029];regulation of transcription, DNA-templated [GO:0006355];transcription, DNA-templated [GO:0006351]	metal ion binding [GO:0046872];NAD-dependent histone deacetylase activity (H3-K14 specific) [GO:0032041]	cytoplasm [GO:0005737];histone deacetylase complex [GO:0000118]	regulation of gene expression, epigenetic [GO:0040029];regulation of transcription, DNA-templated [GO:0006355];transcription, DNA-templated [GO:0006351];metal ion binding [GO:0046872];NAD-dependent histone deacetylase activity (H3-K14 specific) [GO:0032041];cytoplasm [GO:0005737];histone deacetylase complex [GO:0000118]
G3N3Q5	Interferon regulatory factor 7	defense response to virus [GO:0051607];immunoglobulin mediated immune response [GO:0016064];interferon-alpha production [GO:0032607];interferon-beta production [GO:0032608];positive regulation of interferon-alpha production [GO:0032727];positive regulation of interferon-beta production [GO:0032728];positive regulation of transcription by RNA polymerase II [GO:0045944];positive regulation of type …	RNA polymerase II core promoter sequence-specific DNA binding [GO:0000979];transcription factor activity, RNA polymerase II proximal promoter sequence-specific DNA binding [GO:0000982]	cytosol [GO:0005829];nucleoplasm [GO:0005654]	defense response to virus [GO:0051607];immunoglobulin mediated immune response [GO:0016064];interferon-alpha production [GO:0032607];interferon-beta production [GO:0032608];positive regulation of interferon-alpha production [GO:0032727];positive regulation of interferon-beta production [GO:0032728];positive regulation of transcription by RNA polymerase II [GO:0045944];positive regulation of type …
G5E598	CD99 antigen precursor			integral component of membrane [GO:0016021]	integral component of membrane [GO:0016021]
G5E5L5	Transport and Golgi organization protein 1 homolog	cargo loading into COPII-coated vesicle [GO:0090110];exocytosis [GO:0006887];negative regulation of cell adhesion [GO:0007162];negative regulation of cell migration [GO:0030336];positive regulation of leukocyte migration [GO:0002687];wound healing [GO:0042060]	lipoprotein transporter activity [GO:0042954]	endoplasmic reticulum exit site [GO:0070971];endoplasmic reticulum membrane [GO:0005789];Golgi membrane [GO:0000139];integral component of membrane [GO:0016021]	cargo loading into COPII-coated vesicle [GO:0090110];exocytosis [GO:0006887];negative regulation of cell adhesion [GO:0007162];negative regulation of cell migration [GO:0030336];positive regulation of leukocyte migration [GO:0002687];wound healing [GO:0042060];lipoprotein transporter activity [GO:0042954];endoplasmic reticulum exit site [GO:0070971];endoplasmic reticulum membrane [GO:0005789];Gol…
L8HQG4	Lysophosphatidic acid receptor 2		lysophosphatidic acid receptor activity [GO:0070915]	integral component of membrane [GO:0016021]	lysophosphatidic acid receptor activity [GO:0070915];integral component of membrane [GO:0016021]
L8HVC4	Cell division cycle-associated protein 3	cell division [GO:0051301]			cell division [GO:0051301]
L8I241	Interleukin-7 receptor subunit alpha		cytokine receptor activity [GO:0004896]	integral component of membrane [GO:0016021]	cytokine receptor activity [GO:0004896];integral component of membrane [GO:0016021]
L8IKF2	Transcription factor SOX-10		DNA binding [GO:0003677]	nucleus [GO:0005634]	DNA binding [GO:0003677];nucleus [GO:0005634]
L8IV85	Coiled-coil domain-containing protein 138
Q1LZC8	WD repeat domain 13
Q3MIB9	TGFB induced factor homeobox 1		RNA polymerase II proximal promoter sequence-specific DNA binding [GO:0000978];transcriptional repressor activity, RNA polymerase II proximal promoter sequence-specific DNA binding [GO:0001078]	nucleoplasm [GO:0005654]	RNA polymerase II proximal promoter sequence-specific DNA binding [GO:0000978];transcriptional repressor activity, RNA polymerase II proximal promoter sequence-specific DNA binding [GO:0001078];nucleoplasm [GO:0005654]
Q2KJH6	Serpin H1	chondrocyte development involved in endochondral bone morphogenesis [GO:0003433];collagen biosynthetic process [GO:0032964];collagen fibril organization [GO:0030199];protein maturation [GO:0051604]	collagen binding [GO:0005518];serine-type endopeptidase inhibitor activity [GO:0004867];unfolded protein binding [GO:0051082]	endoplasmic reticulum [GO:0005783];endoplasmic reticulum lumen [GO:0005788];endoplasmic reticulum-Golgi intermediate compartment [GO:0005793];membrane raft [GO:0045121]	chondrocyte development involved in endochondral bone morphogenesis [GO:0003433];collagen biosynthetic process [GO:0032964];collagen fibril organization [GO:0030199];protein maturation [GO:0051604];collagen binding [GO:0005518];serine-type endopeptidase inhibitor activity [GO:0004867];unfolded protein binding [GO:0051082];endoplasmic reticulum [GO:0005783];endoplasmic reticulum lumen [GO:0005788]…
Q2T9N0	Fibrous sheath CABYR-binding protein	negative regulation of protein sumoylation [GO:0033234]		motile cilium [GO:0031514]	negative regulation of protein sumoylation [GO:0033234];motile cilium [GO:0031514]
Q2T9U5	RNA exonuclease 5		exonuclease activity [GO:0004527];RNA binding [GO:0003723]	nucleolus [GO:0005730]	exonuclease activity [GO:0004527];RNA binding [GO:0003723];nucleolus [GO:0005730]
Q3ZCH0	Stress-70 protein, mitochondrial	erythrocyte differentiation [GO:0030218];iron-sulfur cluster assembly [GO:0016226];negative regulation of erythrocyte differentiation [GO:0045647];negative regulation of hematopoietic stem cell differentiation [GO:1902037];negative regulation of hemopoiesis [GO:1903707];protein export from nucleus [GO:0006611];protein folding [GO:0006457];regulation of erythrocyte differentiation [GO:0045646]	ATP binding [GO:0005524];ubiquitin protein ligase binding [GO:0031625];unfolded protein binding [GO:0051082]	mitochondrial nucleoid [GO:0042645];mitochondrion [GO:0005739];myelin sheath [GO:0043209];nucleolus [GO:0005730]	erythrocyte differentiation [GO:0030218];iron-sulfur cluster assembly [GO:0016226];negative regulation of erythrocyte differentiation [GO:0045647];negative regulation of hematopoietic stem cell differentiation [GO:1902037];negative regulation of hemopoiesis [GO:1903707];protein export from nucleus [GO:0006611];protein folding [GO:0006457];regulation of erythrocyte differentiation [GO:0045646];ATP…
Q9BEG2	Interleukin-12 receptor subunit beta-2		interleukin-12 binding [GO:0019972];interleukin-12 receptor activity [GO:0016517]	interleukin-12 receptor complex [GO:0042022]	interleukin-12 binding [GO:0019972];interleukin-12 receptor activity [GO:0016517];interleukin-12 receptor complex [GO:0042022]
A6QNS8	HOOK2 protein
E1BNY9	HECT, UBA and WWE domain containing 1, E3 ubiquitin protein ligase	base-excision repair [GO:0006284];histone ubiquitination [GO:0016574];protein monoubiquitination [GO:0006513];protein polyubiquitination [GO:0000209]	ubiquitin protein ligase activity [GO:0061630]	cytoplasm [GO:0005737];cytosol [GO:0005829];nucleoplasm [GO:0005654];nucleus [GO:0005634]	base-excision repair [GO:0006284];histone ubiquitination [GO:0016574];protein monoubiquitination [GO:0006513];protein polyubiquitination [GO:0000209];ubiquitin protein ligase activity [GO:0061630];cytoplasm [GO:0005737];cytosol [GO:0005829];nucleoplasm [GO:0005654];nucleus [GO:0005634]
F1MD62	Rho GTPase activating protein 20	signal transduction [GO:0007165]	GTPase activator activity [GO:0005096]		signal transduction [GO:0007165];GTPase activator activity [GO:0005096]
F1MEP2	Olfactory receptor	G-protein coupled receptor signaling pathway [GO:0007186]	G-protein coupled receptor activity [GO:0004930];olfactory receptor activity [GO:0004984]	integral component of membrane [GO:0016021];plasma membrane [GO:0005886]	G-protein coupled receptor signaling pathway [GO:0007186];G-protein coupled receptor activity [GO:0004930];olfactory receptor activity [GO:0004984];integral component of membrane [GO:0016021];plasma membrane [GO:0005886]
F1MLJ1	Protocadherin beta 1	cell adhesion [GO:0007155];chemical synaptic transmission [GO:0007268];homophilic cell adhesion via plasma membrane adhesion molecules [GO:0007156];synapse assembly [GO:0007416]	calcium ion binding [GO:0005509]	integral component of plasma membrane [GO:0005887]	cell adhesion [GO:0007155];chemical synaptic transmission [GO:0007268];homophilic cell adhesion via plasma membrane adhesion molecules [GO:0007156];synapse assembly [GO:0007416];calcium ion binding [GO:0005509];integral component of plasma membrane [GO:0005887]
F1MYN2	Cingulin		motor activity [GO:0003774]	bicellular tight junction [GO:0005923];myosin complex [GO:0016459];plasma membrane [GO:0005886]	motor activity [GO:0003774];bicellular tight junction [GO:0005923];myosin complex [GO:0016459];plasma membrane [GO:0005886]
G3MYM4	Zinc finger protein 292		nucleic acid binding [GO:0003676]		nucleic acid binding [GO:0003676]
L8HN91	Uncharacterized protein
L8I787	Uncharacterized protein		oxidoreductase activity [GO:0016491]		oxidoreductase activity [GO:0016491]
L8IK18	Liprin-alpha-4			presynaptic active zone [GO:0048786]	presynaptic active zone [GO:0048786]
L8IL87	Switch-associated protein 70
L8IN27	Arf-GAP with Rho-GAP domain, ANK repeat and PH domain-containing protein 1	signal transduction [GO:0007165]	GTPase activator activity [GO:0005096];phosphatidylinositol-3,4,5-trisphosphate binding [GO:0005547]		signal transduction [GO:0007165];GTPase activator activity [GO:0005096];phosphatidylinositol-3,4,5-trisphosphate binding [GO:0005547]
L8IUZ9	Transcription factor E2-alpha		protein dimerization activity [GO:0046983]		protein dimerization activity [GO:0046983]
L8IV02	Zinc finger protein 638	RNA splicing [GO:0008380]	RNA binding [GO:0003723];zinc ion binding [GO:0008270]	nucleus [GO:0005634]	RNA splicing [GO:0008380];RNA binding [GO:0003723];zinc ion binding [GO:0008270];nucleus [GO:0005634]
L8IY17	DNA topoisomerase I, mitochondrial	DNA topological change [GO:0006265]	DNA binding [GO:0003677];DNA topoisomerase type I activity [GO:0003917]	chromosome [GO:0005694]	DNA topological change [GO:0006265];DNA binding [GO:0003677];DNA topoisomerase type I activity [GO:0003917];chromosome [GO:0005694]
L8J4U3	Myotubularin-related protein 7	phosphatidylinositol dephosphorylation [GO:0046856]	phosphatidylinositol phosphate phosphatase activity [GO:0052866];protein tyrosine phosphatase activity [GO:0004725]		phosphatidylinositol dephosphorylation [GO:0046856];phosphatidylinositol phosphate phosphatase activity [GO:0052866];protein tyrosine phosphatase activity [GO:0004725]
Q1ECT0	Secreted and transmembrane protein 1B	immune response [GO:0006955]	cytokine activity [GO:0005125]	integral component of membrane [GO:0016021]	immune response [GO:0006955];cytokine activity [GO:0005125];integral component of membrane [GO:0016021]
Q2KI67	Ecdysoneless cell cycle regulator	cell proliferation [GO:0008283];positive regulation of transcription by RNA polymerase II [GO:0045944];regulation of G1/S transition of mitotic cell cycle [GO:2000045];transcription by RNA polymerase II [GO:0006366]	histone acetyltransferase binding [GO:0035035];transcription coactivator activity [GO:0003713]	cytosol [GO:0005829];nucleoplasm [GO:0005654];nucleus [GO:0005634];R2TP complex [GO:0097255]	cell proliferation [GO:0008283];positive regulation of transcription by RNA polymerase II [GO:0045944];regulation of G1/S transition of mitotic cell cycle [GO:2000045];transcription by RNA polymerase II [GO:0006366];histone acetyltransferase binding [GO:0035035];transcription coactivator activity [GO:0003713];cytosol [GO:0005829];nucleoplasm [GO:0005654];nucleus [GO:0005634];R2TP complex [GO:0097…
P01317	Insulin	estradiol secretion [GO:0035938];feeding behavior [GO:0007631];glucose import in response to insulin stimulus [GO:0044381];glucose metabolic process [GO:0006006];negative regulation of apoptotic process [GO:0043066];negative regulation of appetite [GO:0032099];negative regulation of lactation [GO:1903488];negative regulation of lipid catabolic process [GO:0050995];positive regulation of blood cir…	hormone activity [GO:0005179];identical protein binding [GO:0042802];insulin receptor binding [GO:0005158]	extracellular space [GO:0005615]	estradiol secretion [GO:0035938];feeding behavior [GO:0007631];glucose import in response to insulin stimulus [GO:0044381];glucose metabolic process [GO:0006006];negative regulation of apoptotic process [GO:0043066];negative regulation of appetite [GO:0032099];negative regulation of lactation [GO:1903488];negative regulation of lipid catabolic process [GO:0050995];positive regulation of blood cir…
P27595	Hexokinase-1	cellular glucose homeostasis [GO:0001678];glycolytic process [GO:0006096];hexose metabolic process [GO:0019318]	ATP binding [GO:0005524];fructokinase activity [GO:0008865];glucokinase activity [GO:0004340];glucose binding [GO:0005536];mannokinase activity [GO:0019158]	cytosol [GO:0005829];mitochondrial outer membrane [GO:0005741]	cellular glucose homeostasis [GO:0001678];glycolytic process [GO:0006096];hexose metabolic process [GO:0019318];ATP binding [GO:0005524];fructokinase activity [GO:0008865];glucokinase activity [GO:0004340];glucose binding [GO:0005536];mannokinase activity [GO:0019158];cytosol [GO:0005829];mitochondrial outer membrane [GO:0005741]
Q3SWY1	AT-rich interactive domain-containing protein 5A	innate immune response [GO:0045087];regulation of transcription by RNA polymerase II [GO:0006357];transcription, DNA-templated [GO:0006351]	RNA binding [GO:0003723];transcription regulatory region DNA binding [GO:0044212]	nucleus [GO:0005634]	innate immune response [GO:0045087];regulation of transcription by RNA polymerase II [GO:0006357];transcription, DNA-templated [GO:0006351];RNA binding [GO:0003723];transcription regulatory region DNA binding [GO:0044212];nucleus [GO:0005634]
Q3T0G1	THAP domain-containing protein 1	cell cycle [GO:0007049];endothelial cell proliferation [GO:0001935];negative regulation of transcription by RNA polymerase II [GO:0000122];regulation of mitotic cell cycle [GO:0007346];regulation of transcription, DNA-templated [GO:0006355];transcription, DNA-templated [GO:0006351]	protein homodimerization activity [GO:0042803];RNA polymerase II proximal promoter sequence-specific DNA binding [GO:0000978];sequence-specific DNA binding [GO:0043565];zinc ion binding [GO:0008270]	fibrillar center [GO:0001650];nucleus [GO:0005634];PML body [GO:0016605]	cell cycle [GO:0007049];endothelial cell proliferation [GO:0001935];negative regulation of transcription by RNA polymerase II [GO:0000122];regulation of mitotic cell cycle [GO:0007346];regulation of transcription, DNA-templated [GO:0006355];transcription, DNA-templated [GO:0006351];protein homodimerization activity [GO:0042803];RNA polymerase II proximal promoter sequence-specific DNA binding [GO…
Q58CT4	Transmembrane protein 180			integral component of membrane [GO:0016021]	integral component of membrane [GO:0016021]
A4Z8Q1	Lysozyme	cytolysis [GO:0019835];defense response to bacterium [GO:0042742];metabolic process [GO:0008152]	lysozyme activity [GO:0003796]		cytolysis [GO:0019835];defense response to bacterium [GO:0042742];metabolic process [GO:0008152];lysozyme activity [GO:0003796]
A5PJL4	Ribosomal protein S6 kinase	intracellular signal transduction [GO:0035556]	ATP binding [GO:0005524];magnesium ion binding [GO:0000287];protein serine/threonine kinase activity [GO:0004674]	intracellular [GO:0005622]	intracellular signal transduction [GO:0035556];ATP binding [GO:0005524];magnesium ion binding [GO:0000287];protein serine/threonine kinase activity [GO:0004674];intracellular [GO:0005622]
A6QLD6	MYO1B protein	actin filament bundle assembly [GO:0051017];actin filament-based movement [GO:0030048];microtubule-based movement [GO:0007018];post-Golgi vesicle-mediated transport [GO:0006892]	actin filament binding [GO:0051015];ATP binding [GO:0005524];microfilament motor activity [GO:0000146];microtubule binding [GO:0008017];microtubule motor activity [GO:0003777];phosphatidylinositol-3,4,5-trisphosphate binding [GO:0005547];phosphatidylinositol-4,5-bisphosphate binding [GO:0005546]	actin filament [GO:0005884];brush border [GO:0005903];cell periphery [GO:0071944];cytoplasm [GO:0005737];early endosome [GO:0005769];endosome membrane [GO:0010008];filopodium [GO:0030175];myosin complex [GO:0016459];perinuclear region of cytoplasm [GO:0048471];plasma membrane [GO:0005886];trans-Golgi network membrane [GO:0032588]	actin filament bundle assembly [GO:0051017];actin filament-based movement [GO:0030048];microtubule-based movement [GO:0007018];post-Golgi vesicle-mediated transport [GO:0006892];actin filament binding [GO:0051015];ATP binding [GO:0005524];microfilament motor activity [GO:0000146];microtubule binding [GO:0008017];microtubule motor activity [GO:0003777];phosphatidylinositol-3,4,5-trisphosphate bind…
A6QLL6	TRIM40 protein		zinc ion binding [GO:0008270]	intracellular [GO:0005622]	zinc ion binding [GO:0008270];intracellular [GO:0005622]
A6QNK2	ZSWIM1 protein		zinc ion binding [GO:0008270]		zinc ion binding [GO:0008270]
A7MB41	DNA-binding protein SATB	activated T cell proliferation [GO:0050798];CD4-positive, alpha-beta T cell differentiation [GO:0043367];CD8-positive, alpha-beta T cell differentiation [GO:0043374];chromatin remodeling [GO:0006338];epidermis development [GO:0008544];histone methylation [GO:0016571];reflex [GO:0060004];regulation of transcription by RNA polymerase II [GO:0006357];transcription, DNA-templated [GO:0006351]	chromatin binding [GO:0003682];RNA polymerase II regulatory region sequence-specific DNA binding [GO:0000977];sequence-specific DNA binding [GO:0043565];transcriptional repressor activity, RNA polymerase II transcription regulatory region sequence-specific DNA binding [GO:0001227]	nuclear heterochromatin [GO:0005720];nuclear matrix [GO:0016363];nucleus [GO:0005634];PML body [GO:0016605]	activated T cell proliferation [GO:0050798];CD4-positive, alpha-beta T cell differentiation [GO:0043367];CD8-positive, alpha-beta T cell differentiation [GO:0043374];chromatin remodeling [GO:0006338];epidermis development [GO:0008544];histone methylation [GO:0016571];reflex [GO:0060004];regulation of transcription by RNA polymerase II [GO:0006357];transcription, DNA-templated [GO:0006351];chromat…
D2XNC4	Gonadotropin-releasing hormone receptor		gonadotropin-releasing hormone receptor activity [GO:0004968]	integral component of membrane [GO:0016021]	gonadotropin-releasing hormone receptor activity [GO:0004968];integral component of membrane [GO:0016021]
E1B8H0	Pseudopodium enriched atypical kinase 1	cell migration [GO:0016477];protein autophosphorylation [GO:0046777];substrate adhesion-dependent cell spreading [GO:0034446]	ATP binding [GO:0005524];non-membrane spanning protein tyrosine kinase activity [GO:0004715];protein kinase activity [GO:0004672]	actin cytoskeleton [GO:0015629];focal adhesion [GO:0005925]	cell migration [GO:0016477];protein autophosphorylation [GO:0046777];substrate adhesion-dependent cell spreading [GO:0034446];ATP binding [GO:0005524];non-membrane spanning protein tyrosine kinase activity [GO:0004715];protein kinase activity [GO:0004672];actin cytoskeleton [GO:0015629];focal adhesion [GO:0005925]
E1BA10	Uncharacterized protein
E1BC33	Uncharacterized protein		ATP binding [GO:0005524];DNA binding [GO:0003677]		ATP binding [GO:0005524];DNA binding [GO:0003677]
E1BDP3	Aldehyde dehydrogenase 5 family member A1	acetate metabolic process [GO:0006083];central nervous system development [GO:0007417];galactosylceramide metabolic process [GO:0006681];gamma-aminobutyric acid catabolic process [GO:0009450];glucose metabolic process [GO:0006006];glucosylceramide metabolic process [GO:0006678];glutamate decarboxylation to succinate [GO:0006540];glutamine metabolic process [GO:0006541];glutathione metabolic proce…	NAD binding [GO:0051287];succinate-semialdehyde dehydrogenase (NAD+) activity [GO:0004777];succinate-semialdehyde dehydrogenase [NAD(P)+] activity [GO:0009013]	mitochondrion [GO:0005739]	acetate metabolic process [GO:0006083];central nervous system development [GO:0007417];galactosylceramide metabolic process [GO:0006681];gamma-aminobutyric acid catabolic process [GO:0009450];glucose metabolic process [GO:0006006];glucosylceramide metabolic process [GO:0006678];glutamate decarboxylation to succinate [GO:0006540];glutamine metabolic process [GO:0006541];glutathione metabolic proce…
E1BDX8	Cytoplasmic dynein 1 heavy chain 1	cytoplasmic microtubule organization [GO:0031122];minus-end-directed vesicle transport along microtubule [GO:0072382]	ATP binding [GO:0005524];ATP-dependent microtubule motor activity, minus-end-directed [GO:0008569];dynein intermediate chain binding [GO:0045505];dynein light chain binding [GO:0045503];dynein light intermediate chain binding [GO:0051959]	cytoplasmic dynein complex [GO:0005868]	cytoplasmic microtubule organization [GO:0031122];minus-end-directed vesicle transport along microtubule [GO:0072382];ATP binding [GO:0005524];ATP-dependent microtubule motor activity, minus-end-directed [GO:0008569];dynein intermediate chain binding [GO:0045505];dynein light chain binding [GO:0045503];dynein light intermediate chain binding [GO:0051959];cytoplasmic dynein complex [GO:0005868]
E1BF32	Neurite extension and migration factor	error-prone translesion synthesis [GO:0042276]		nucleus [GO:0005634];zeta DNA polymerase complex [GO:0016035]	error-prone translesion synthesis [GO:0042276];nucleus [GO:0005634];zeta DNA polymerase complex [GO:0016035]
E1BHV1	Ryanodine receptor 2		calcium ion binding [GO:0005509];ryanodine-sensitive calcium-release channel activity [GO:0005219]	cell [GO:0005623];integral component of membrane [GO:0016021]	calcium ion binding [GO:0005509];ryanodine-sensitive calcium-release channel activity [GO:0005219];cell [GO:0005623];integral component of membrane [GO:0016021]
E1BQ28	Solute carrier family 39 member 8	cadmium ion transmembrane transport [GO:0070574];cellular zinc ion homeostasis [GO:0006882];zinc ion import across plasma membrane [GO:0071578]	zinc ion transmembrane transporter activity [GO:0005385]	integral component of plasma membrane [GO:0005887];organelle membrane [GO:0031090]	cadmium ion transmembrane transport [GO:0070574];cellular zinc ion homeostasis [GO:0006882];zinc ion import across plasma membrane [GO:0071578];zinc ion transmembrane transporter activity [GO:0005385];integral component of plasma membrane [GO:0005887];organelle membrane [GO:0031090]
E1BQ34	Homeodomain interacting protein kinase 1	adherens junction assembly [GO:0034333];anterior/posterior pattern specification [GO:0009952];embryonic camera-type eye morphogenesis [GO:0048596];embryonic retina morphogenesis in camera-type eye [GO:0060059];endothelial cell apoptotic process [GO:0072577];extrinsic apoptotic signaling pathway [GO:0097191];intrinsic apoptotic signaling pathway in response to DNA damage by p53 class mediator [GO:…	ATP binding [GO:0005524];protein kinase activity [GO:0004672]	centrosome [GO:0005813];cytosol [GO:0005829];nuclear speck [GO:0016607];PML body [GO:0016605]	adherens junction assembly [GO:0034333];anterior/posterior pattern specification [GO:0009952];embryonic camera-type eye morphogenesis [GO:0048596];embryonic retina morphogenesis in camera-type eye [GO:0060059];endothelial cell apoptotic process [GO:0072577];extrinsic apoptotic signaling pathway [GO:0097191];intrinsic apoptotic signaling pathway in response to DNA damage by p53 class mediator [GO:…
F1MB31	Uncharacterized protein		serine-type endopeptidase activity [GO:0004252]		serine-type endopeptidase activity [GO:0004252]
F1MIX0	BRISC complex subunit Abraxas 2
F1MLB8	ATP synthase subunit alpha	ATP synthesis coupled proton transport [GO:0015986];lipid metabolic process [GO:0006629];negative regulation of endothelial cell proliferation [GO:0001937];positive regulation of blood vessel endothelial cell migration [GO:0043536]	angiostatin binding [GO:0043532];ATP binding [GO:0005524];MHC class I protein binding [GO:0042288];proton-transporting ATP synthase activity, rotational mechanism [GO:0046933]	COP9 signalosome [GO:0008180];mitochondrial proton-transporting ATP synthase complex [GO:0005753];myelin sheath [GO:0043209];plasma membrane [GO:0005886];proton-transporting ATP synthase complex, catalytic core F(1) [GO:0045261]	ATP synthesis coupled proton transport [GO:0015986];lipid metabolic process [GO:0006629];negative regulation of endothelial cell proliferation [GO:0001937];positive regulation of blood vessel endothelial cell migration [GO:0043536];angiostatin binding [GO:0043532];ATP binding [GO:0005524];MHC class I protein binding [GO:0042288];proton-transporting ATP synthase activity, rotational mechanism [GO:…
F1MRT3	Protein regulator of cytokinesis 1	cytokinesis [GO:0000910];microtubule bundle formation [GO:0001578];positive regulation of cell proliferation [GO:0008284];regulation of cytokinesis [GO:0032465]	kinesin binding [GO:0019894];microtubule binding [GO:0008017];protein kinase binding [GO:0019901]	contractile ring [GO:0070938];midbody [GO:0030496];nucleus [GO:0005634];spindle [GO:0005819]	cytokinesis [GO:0000910];microtubule bundle formation [GO:0001578];positive regulation of cell proliferation [GO:0008284];regulation of cytokinesis [GO:0032465];kinesin binding [GO:0019894];microtubule binding [GO:0008017];protein kinase binding [GO:0019901];contractile ring [GO:0070938];midbody [GO:0030496];nucleus [GO:0005634];spindle [GO:0005819]
F1MRX4	Ribosome biogenesis protein BOP1	cell proliferation [GO:0008283];cleavage in ITS2 between 5.8S rRNA and LSU-rRNA of tricistronic rRNA transcript (SSU-rRNA, 5.8S rRNA, LSU-rRNA) [GO:0000448];maturation of LSU-rRNA from tricistronic rRNA transcript (SSU-rRNA, 5.8S rRNA, LSU-rRNA) [GO:0000463];regulation of cell cycle [GO:0051726];regulation of signal transduction by p53 class mediator [GO:1901796];ribosomal large subunit assembly …	ribonucleoprotein complex binding [GO:0043021]	nucleoplasm [GO:0005654];PeBoW complex [GO:0070545];preribosome, large subunit precursor [GO:0030687]	cell proliferation [GO:0008283];cleavage in ITS2 between 5.8S rRNA and LSU-rRNA of tricistronic rRNA transcript (SSU-rRNA, 5.8S rRNA, LSU-rRNA) [GO:0000448];maturation of LSU-rRNA from tricistronic rRNA transcript (SSU-rRNA, 5.8S rRNA, LSU-rRNA) [GO:0000463];regulation of cell cycle [GO:0051726];regulation of signal transduction by p53 class mediator [GO:1901796];ribosomal large subunit assembly …
F1MS46	WNT1 inducible signaling pathway protein 1	cell adhesion [GO:0007155];cell-cell signaling [GO:0007267];negative regulation of cell death [GO:0060548];regulation of cell growth [GO:0001558];signal transduction [GO:0007165]	heparin binding [GO:0008201];insulin-like growth factor binding [GO:0005520];integrin binding [GO:0005178]	cytosol [GO:0005829];proteinaceous extracellular matrix [GO:0005578]	cell adhesion [GO:0007155];cell-cell signaling [GO:0007267];negative regulation of cell death [GO:0060548];regulation of cell growth [GO:0001558];signal transduction [GO:0007165];heparin binding [GO:0008201];insulin-like growth factor binding [GO:0005520];integrin binding [GO:0005178];cytosol [GO:0005829];proteinaceous extracellular matrix [GO:0005578]
F1MX60	Cytoplasmic FMR1-interacting protein 2	activation of cysteine-type endopeptidase activity [GO:0097202];apoptotic process [GO:0006915];cell-cell adhesion [GO:0098609];dendrite extension [GO:0097484];positive regulation of neurotrophin TRK receptor signaling pathway [GO:0051388]		perinuclear region of cytoplasm [GO:0048471];synapse [GO:0045202]	activation of cysteine-type endopeptidase activity [GO:0097202];apoptotic process [GO:0006915];cell-cell adhesion [GO:0098609];dendrite extension [GO:0097484];positive regulation of neurotrophin TRK receptor signaling pathway [GO:0051388];perinuclear region of cytoplasm [GO:0048471];synapse [GO:0045202]
F1MXN1	Cilia and flagella associated protein 221	cilium assembly [GO:0060271];cilium movement [GO:0003341]		cilium [GO:0005929]	cilium assembly [GO:0060271];cilium movement [GO:0003341];cilium [GO:0005929]
F1MZ06	Prickle planar cell polarity protein 1	aorta development [GO:0035904];coronary vasculature development [GO:0060976];negative regulation of canonical Wnt signaling pathway [GO:0090090];negative regulation of cardiac muscle cell myoblast differentiation [GO:2000691];negative regulation of transcription, DNA-templated [GO:0045892];neural tube closure [GO:0001843];positive regulation of proteasomal ubiquitin-dependent protein catabolic pr…	zinc ion binding [GO:0008270]	cytosol [GO:0005829];nuclear membrane [GO:0031965]	aorta development [GO:0035904];coronary vasculature development [GO:0060976];negative regulation of canonical Wnt signaling pathway [GO:0090090];negative regulation of cardiac muscle cell myoblast differentiation [GO:2000691];negative regulation of transcription, DNA-templated [GO:0045892];neural tube closure [GO:0001843];positive regulation of proteasomal ubiquitin-dependent protein catabolic pr…
F1MZ69	Sperm associated antigen 9	activation of JUN kinase activity [GO:0007257];negative regulation of protein homodimerization activity [GO:0090074];positive regulation of cell migration [GO:0030335];positive regulation of neuron differentiation [GO:0045666];protein homooligomerization [GO:0051260];retrograde transport, endosome to Golgi [GO:0042147];striated muscle cell differentiation [GO:0051146];vesicle-mediated transport […	JUN kinase binding [GO:0008432];kinesin binding [GO:0019894];MAP-kinase scaffold activity [GO:0005078];mitogen-activated protein kinase p38 binding [GO:0048273];receptor signaling complex scaffold activity [GO:0030159]	cytoplasm [GO:0005737];cytosol [GO:0005829];integral component of membrane [GO:0016021];microtubule organizing center [GO:0005815];perinuclear region of cytoplasm [GO:0048471]	activation of JUN kinase activity [GO:0007257];negative regulation of protein homodimerization activity [GO:0090074];positive regulation of cell migration [GO:0030335];positive regulation of neuron differentiation [GO:0045666];protein homooligomerization [GO:0051260];retrograde transport, endosome to Golgi [GO:0042147];striated muscle cell differentiation [GO:0051146];vesicle-mediated transport […
F1N215	GLI family zinc finger 3	anterior semicircular canal development [GO:0060873];anterior/posterior pattern specification [GO:0009952];artery development [GO:0060840];axon guidance [GO:0007411];branching involved in ureteric bud morphogenesis [GO:0001658];camera-type eye morphogenesis [GO:0048593];cell differentiation involved in kidney development [GO:0061005];developmental growth [GO:0048589];embryonic digestive tract mor…	beta-catenin binding [GO:0008013];chromatin binding [GO:0003682];DNA binding transcription factor activity [GO:0003700];histone acetyltransferase binding [GO:0035035];histone deacetylase binding [GO:0042826];RNA polymerase II proximal promoter sequence-specific DNA binding [GO:0000978]	axoneme [GO:0005930];cytosol [GO:0005829];mediator complex [GO:0016592];nuclear speck [GO:0016607];transcriptional repressor complex [GO:0017053]	anterior semicircular canal development [GO:0060873];anterior/posterior pattern specification [GO:0009952];artery development [GO:0060840];axon guidance [GO:0007411];branching involved in ureteric bud morphogenesis [GO:0001658];camera-type eye morphogenesis [GO:0048593];cell differentiation involved in kidney development [GO:0061005];developmental growth [GO:0048589];embryonic digestive tract mor…
F1N2Q9	DIRAS family GTPase 2	signal transduction [GO:0007165]	GTP binding [GO:0005525];GTPase activity [GO:0003924]	plasma membrane [GO:0005886]	signal transduction [GO:0007165];GTP binding [GO:0005525];GTPase activity [GO:0003924];plasma membrane [GO:0005886]
G3N265	CREB3 regulatory factor	maternal behavior [GO:0042711];negative regulation of glucocorticoid mediated signaling pathway [GO:1900170];positive regulation of prolactin signaling pathway [GO:1902213]	RNA polymerase II regulatory region sequence-specific DNA binding [GO:0000977];transcriptional activator activity, RNA polymerase II transcription regulatory region sequence-specific DNA binding [GO:0001228]	nuclear body [GO:0016604]	maternal behavior [GO:0042711];negative regulation of glucocorticoid mediated signaling pathway [GO:1900170];positive regulation of prolactin signaling pathway [GO:1902213];RNA polymerase II regulatory region sequence-specific DNA binding [GO:0000977];transcriptional activator activity, RNA polymerase II transcription regulatory region sequence-specific DNA binding [GO:0001228];nuclear body [GO:0…
L8I502	Uncharacterized protein
L8I9E1	Protein EFR3-like protein A
L8IBK8	Glutaryl-CoA dehydrogenase, mitochondrial		acyl-CoA dehydrogenase activity [GO:0003995];flavin adenine dinucleotide binding [GO:0050660]		acyl-CoA dehydrogenase activity [GO:0003995];flavin adenine dinucleotide binding [GO:0050660]
L8ICL6	Junction plakoglobin	adherens junction assembly [GO:0034333];cell adhesion [GO:0007155];desmosome assembly [GO:0002159]	alpha-catenin binding [GO:0045294];cadherin binding [GO:0045296];signal transducer activity [GO:0004871];structural molecule activity [GO:0005198]	catenin complex [GO:0016342];cell-cell adherens junction [GO:0005913]	adherens junction assembly [GO:0034333];cell adhesion [GO:0007155];desmosome assembly [GO:0002159];alpha-catenin binding [GO:0045294];cadherin binding [GO:0045296];signal transducer activity [GO:0004871];structural molecule activity [GO:0005198];catenin complex [GO:0016342];cell-cell adherens junction [GO:0005913]
L8ICQ1	KN motif and ankyrin repeat domain-containing protein 1
L8IKX2	Fibroblast growth factor	fibroblast growth factor receptor signaling pathway [GO:0008543]	fibroblast growth factor receptor binding [GO:0005104];growth factor activity [GO:0008083]	extracellular region [GO:0005576]	fibroblast growth factor receptor signaling pathway [GO:0008543];fibroblast growth factor receptor binding [GO:0005104];growth factor activity [GO:0008083];extracellular region [GO:0005576]
L8IPB8	Small proline-rich protein 4
L8IR84	TBC1 domain family member 9B		calcium ion binding [GO:0005509]		calcium ion binding [GO:0005509]
L8IZR0	Uncharacterized protein
L8J0N6	Microtubule-associated protein 1B	microtubule cytoskeleton organization [GO:0000226];nervous system development [GO:0007399]	microtubule binding [GO:0008017]	microtubule [GO:0005874]	microtubule cytoskeleton organization [GO:0000226];nervous system development [GO:0007399];microtubule binding [GO:0008017];microtubule [GO:0005874]
Q1RMT6	Drebrin 1	actin filament organization [GO:0007015];cell communication by chemical coupling [GO:0010643];cell communication by electrical coupling [GO:0010644];generation of neurons [GO:0048699];maintenance of protein location in cell [GO:0032507];neural precursor cell proliferation [GO:0061351]	actin binding [GO:0003779]	actin cytoskeleton [GO:0015629];gap junction [GO:0005921];growth cone [GO:0030426];plasma membrane [GO:0005886]	actin filament organization [GO:0007015];cell communication by chemical coupling [GO:0010643];cell communication by electrical coupling [GO:0010644];generation of neurons [GO:0048699];maintenance of protein location in cell [GO:0032507];neural precursor cell proliferation [GO:0061351];actin binding [GO:0003779];actin cytoskeleton [GO:0015629];gap junction [GO:0005921];growth cone [GO:0030426];pla…
Q2KIF7	PDIK1L protein		ATP binding [GO:0005524];protein serine/threonine kinase activity [GO:0004674]		ATP binding [GO:0005524];protein serine/threonine kinase activity [GO:0004674]
Q2NKS1	V-type proton ATPase subunit G	proton transmembrane transport [GO:1902600]	ATPase activity, coupled to transmembrane movement of substances [GO:0042626]	vacuolar proton-transporting V-type ATPase complex [GO:0016471]	proton transmembrane transport [GO:1902600];ATPase activity, coupled to transmembrane movement of substances [GO:0042626];vacuolar proton-transporting V-type ATPase complex [GO:0016471]
R9QSM8	Alpha-2-macroglobulin		endopeptidase inhibitor activity [GO:0004866]	extracellular space [GO:0005615]	endopeptidase inhibitor activity [GO:0004866];extracellular space [GO:0005615]
A5PK74	Ribosomal oxygenase 1	chromatin remodeling [GO:0006338];histone H3-K36 demethylation [GO:0070544];histone H3-K4 demethylation [GO:0034720];negative regulation of osteoblast differentiation [GO:0045668];negative regulation of transcription, DNA-templated [GO:0045892];peptidyl-arginine hydroxylation [GO:0030961];transcription, DNA-templated [GO:0006351]	histone demethylase activity (H3-K36 specific) [GO:0051864];histone demethylase activity (H3-K4 specific) [GO:0032453];iron ion binding [GO:0005506];oxidoreductase activity, acting on paired donors, with incorporation or reduction of molecular oxygen, 2-oxoglutarate as one donor, and incorporation of one atom each of oxygen into both donors [GO:0016706]	nucleolus [GO:0005730];nucleoplasm [GO:0005654];nucleus [GO:0005634]	chromatin remodeling [GO:0006338];histone H3-K36 demethylation [GO:0070544];histone H3-K4 demethylation [GO:0034720];negative regulation of osteoblast differentiation [GO:0045668];negative regulation of transcription, DNA-templated [GO:0045892];peptidyl-arginine hydroxylation [GO:0030961];transcription, DNA-templated [GO:0006351];histone demethylase activity (H3-K36 specific) [GO:0051864];histone…
A6QQL0	Solute carrier family 15 member 4	oligopeptide transport [GO:0006857];protein transport [GO:0015031]	symporter activity [GO:0015293]	integral component of membrane [GO:0016021]	oligopeptide transport [GO:0006857];protein transport [GO:0015031];symporter activity [GO:0015293];integral component of membrane [GO:0016021]
P00432	Catalase	aerobic respiration [GO:0009060];cholesterol metabolic process [GO:0008203];hemoglobin metabolic process [GO:0020027];hydrogen peroxide catabolic process [GO:0042744];negative regulation of apoptotic process [GO:0043066];negative regulation of NF-kappaB transcription factor activity [GO:0032088];oxidation-reduction process [GO:0055114];positive regulation of cell division [GO:0051781];positive re…	aminoacylase activity [GO:0004046];catalase activity [GO:0004096];enzyme binding [GO:0019899];heme binding [GO:0020037];metal ion binding [GO:0046872];NADP binding [GO:0050661];protein homodimerization activity [GO:0042803];signaling receptor binding [GO:0005102]	mitochondrion [GO:0005739];peroxisomal membrane [GO:0005778];peroxisome [GO:0005777]	aerobic respiration [GO:0009060];cholesterol metabolic process [GO:0008203];hemoglobin metabolic process [GO:0020027];hydrogen peroxide catabolic process [GO:0042744];negative regulation of apoptotic process [GO:0043066];negative regulation of NF-kappaB transcription factor activity [GO:0032088];oxidation-reduction process [GO:0055114];positive regulation of cell division [GO:0051781];positive re…
P04272	Annexin A2	biomineral tissue development [GO:0031214];calcium ion import [GO:0070509];calcium ion transmembrane transport [GO:0070588]	calcium channel activity [GO:0005262];calcium ion binding [GO:0005509];calcium-dependent phospholipid binding [GO:0005544];cytoskeletal protein binding [GO:0008092];phosphatidylserine binding [GO:0001786];phospholipase inhibitor activity [GO:0004859]	basement membrane [GO:0005604];cytosol [GO:0005829];extracellular membrane-bounded organelle [GO:0065010];intracellular membrane-bounded organelle [GO:0043231];melanosome [GO:0042470];membrane [GO:0016020];nucleus [GO:0005634];plasma membrane [GO:0005886];vesicle [GO:0031982]	biomineral tissue development [GO:0031214];calcium ion import [GO:0070509];calcium ion transmembrane transport [GO:0070588];calcium channel activity [GO:0005262];calcium ion binding [GO:0005509];calcium-dependent phospholipid binding [GO:0005544];cytoskeletal protein binding [GO:0008092];phosphatidylserine binding [GO:0001786];phospholipase inhibitor activity [GO:0004859];basement membrane [GO:00…
P11179	Dihydrolipoyllysine-residue succinyltransferase component of 2-oxoglutarate dehydrogenase complex, mitochondrial	2-oxoglutarate metabolic process [GO:0006103];histone succinylation [GO:0106077];L-lysine catabolic process to acetyl-CoA via saccharopine [GO:0033512];succinyl-CoA metabolic process [GO:0006104];tricarboxylic acid cycle [GO:0006099]	dihydrolipoyllysine-residue succinyltransferase activity [GO:0004149]	mitochondrial matrix [GO:0005759];mitochondrion [GO:0005739];nucleus [GO:0005634];oxoglutarate dehydrogenase complex [GO:0045252]	2-oxoglutarate metabolic process [GO:0006103];histone succinylation [GO:0106077];L-lysine catabolic process to acetyl-CoA via saccharopine [GO:0033512];succinyl-CoA metabolic process [GO:0006104];tricarboxylic acid cycle [GO:0006099];dihydrolipoyllysine-residue succinyltransferase activity [GO:0004149];mitochondrial matrix [GO:0005759];mitochondrion [GO:0005739];nucleus [GO:0005634];oxoglutarate …
P18493	Poly [ADP-ribose] polymerase 1	ATP generation from poly-ADP-D-ribose [GO:1990966];cellular response to DNA damage stimulus [GO:0006974];DNA ligation involved in DNA repair [GO:0051103];double-strand break repair [GO:0006302];lagging strand elongation [GO:0006273];peptidyl-serine ADP-ribosylation [GO:0018312];positive regulation of cardiac muscle hypertrophy [GO:0010613];protein ADP-ribosylation [GO:0006471];regulation of trans…	DNA binding [GO:0003677];DNA ligase (ATP) activity [GO:0003910];NAD binding [GO:0051287];NAD+ ADP-ribosyltransferase activity [GO:0003950];protein ADP-ribosylase activity [GO:1990404];zinc ion binding [GO:0008270]	cytoplasm [GO:0005737];nuclear envelope [GO:0005635];nucleolus [GO:0005730]	ATP generation from poly-ADP-D-ribose [GO:1990966];cellular response to DNA damage stimulus [GO:0006974];DNA ligation involved in DNA repair [GO:0051103];double-strand break repair [GO:0006302];lagging strand elongation [GO:0006273];peptidyl-serine ADP-ribosylation [GO:0018312];positive regulation of cardiac muscle hypertrophy [GO:0010613];protein ADP-ribosylation [GO:0006471];regulation of trans…
Q08DA3	Ubiquitin carboxyl-terminal hydrolase 16	cell division [GO:0051301];cellular response to DNA damage stimulus [GO:0006974];histone deubiquitination [GO:0016578];histone H2A K63-linked deubiquitination [GO:0070537];mitotic cell cycle [GO:0000278];monoubiquitinated histone H2A deubiquitination [GO:0035522];positive regulation of transcription by RNA polymerase II [GO:0045944];positive regulation of transcription, DNA-templated [GO:0045893]…	cysteine-type endopeptidase activity [GO:0004197];histone binding [GO:0042393];thiol-dependent ubiquitin-specific protease activity [GO:0004843];thiol-dependent ubiquitinyl hydrolase activity [GO:0036459];transcription coactivator activity [GO:0003713];ubiquitin binding [GO:0043130];zinc ion binding [GO:0008270]	nucleus [GO:0005634]	cell division [GO:0051301];cellular response to DNA damage stimulus [GO:0006974];histone deubiquitination [GO:0016578];histone H2A K63-linked deubiquitination [GO:0070537];mitotic cell cycle [GO:0000278];monoubiquitinated histone H2A deubiquitination [GO:0035522];positive regulation of transcription by RNA polymerase II [GO:0045944];positive regulation of transcription, DNA-templated [GO:0045893]…
Q08DN8	Flotillin-1	axonogenesis [GO:0007409];cellular response to exogenous dsRNA [GO:0071360];dsRNA transport [GO:0033227];extracellular matrix disassembly [GO:0022617];plasma membrane raft assembly [GO:0044854];positive regulation of cell adhesion molecule production [GO:0060355];positive regulation of cell junction assembly [GO:1901890];positive regulation of cell-cell adhesion mediated by cadherin [GO:2000049];…	protease binding [GO:0002020];protein heterodimerization activity [GO:0046982]	basolateral plasma membrane [GO:0016323];cell-cell adherens junction [GO:0005913];cell-cell contact zone [GO:0044291];centriolar satellite [GO:0034451];COP9 signalosome [GO:0008180];cortical actin cytoskeleton [GO:0030864];early endosome [GO:0005769];endosome [GO:0005768];flotillin complex [GO:0016600];lamellipodium [GO:0030027];melanosome [GO:0042470];membrane raft [GO:0045121];sarcolemma [GO:00…	axonogenesis [GO:0007409];cellular response to exogenous dsRNA [GO:0071360];dsRNA transport [GO:0033227];extracellular matrix disassembly [GO:0022617];plasma membrane raft assembly [GO:0044854];positive regulation of cell adhesion molecule production [GO:0060355];positive regulation of cell junction assembly [GO:1901890];positive regulation of cell-cell adhesion mediated by cadherin [GO:2000049];…
Q3MHN5	Vitamin D-binding protein		actin binding [GO:0003779];vitamin D binding [GO:0005499];vitamin transmembrane transporter activity [GO:0090482]	extracellular space [GO:0005615]	actin binding [GO:0003779];vitamin D binding [GO:0005499];vitamin transmembrane transporter activity [GO:0090482];extracellular space [GO:0005615]
Q3SZ41	Recombining binding protein suppressor of hairless	angiogenesis [GO:0001525];arterial endothelial cell fate commitment [GO:0060844];atrioventricular canal development [GO:0036302];auditory receptor cell fate commitment [GO:0009912];B cell differentiation [GO:0030183];blood vessel endothelial cell fate specification [GO:0097101];blood vessel lumenization [GO:0072554];blood vessel remodeling [GO:0001974];cardiac left ventricle morphogenesis [GO:000…	chromatin binding [GO:0003682];protein N-terminus binding [GO:0047485];RNA polymerase II proximal promoter sequence-specific DNA binding [GO:0000978];RNA polymerase II repressing transcription factor binding [GO:0001103];sequence-specific DNA binding [GO:0043565];transcription factor binding [GO:0008134];transcriptional activator activity, RNA polymerase II proximal promoter sequence-specific DNA…	cytoplasm [GO:0005737];MAML1-RBP-Jkappa- ICN1 complex [GO:0002193];nucleolus [GO:0005730];nucleoplasm [GO:0005654];nucleus [GO:0005634];transcription factor complex [GO:0005667];transcriptional repressor complex [GO:0017053]	angiogenesis [GO:0001525];arterial endothelial cell fate commitment [GO:0060844];atrioventricular canal development [GO:0036302];auditory receptor cell fate commitment [GO:0009912];B cell differentiation [GO:0030183];blood vessel endothelial cell fate specification [GO:0097101];blood vessel lumenization [GO:0072554];blood vessel remodeling [GO:0001974];cardiac left ventricle morphogenesis [GO:000…
Q4PJK1	Voltage-gated potassium channel subunit beta-1	oxidation-reduction process [GO:0055114];regulation of delayed rectifier potassium channel activity [GO:1902259];regulation of potassium ion transmembrane transport [GO:1901379]	aldo-keto reductase (NADP) activity [GO:0004033];NADPH binding [GO:0070402];potassium channel regulator activity [GO:0015459];voltage-gated potassium channel activity [GO:0005249]	cytosol [GO:0005829];extrinsic component of cytoplasmic side of plasma membrane [GO:0031234];potassium channel complex [GO:0034705]	oxidation-reduction process [GO:0055114];regulation of delayed rectifier potassium channel activity [GO:1902259];regulation of potassium ion transmembrane transport [GO:1901379];aldo-keto reductase (NADP) activity [GO:0004033];NADPH binding [GO:0070402];potassium channel regulator activity [GO:0015459];voltage-gated potassium channel activity [GO:0005249];cytosol [GO:0005829];extrinsic component …
Q5E9H1	Fin bud initiation factor homolog	protein kinase C signaling [GO:0070528];response to dexamethasone [GO:0071548];response to manganese ion [GO:0010042]	protein homodimerization activity [GO:0042803]	endoplasmic reticulum [GO:0005783];extracellular region [GO:0005576];Golgi apparatus [GO:0005794]	protein kinase C signaling [GO:0070528];response to dexamethasone [GO:0071548];response to manganese ion [GO:0010042];protein homodimerization activity [GO:0042803];endoplasmic reticulum [GO:0005783];extracellular region [GO:0005576];Golgi apparatus [GO:0005794]
Q8WN55	Polypyrimidine tract-binding protein 1	IRES-dependent viral translational initiation [GO:0075522];mRNA processing [GO:0006397];negative regulation of mRNA splicing, via spliceosome [GO:0048025];negative regulation of muscle cell differentiation [GO:0051148];regulation of alternative mRNA splicing, via spliceosome [GO:0000381];RNA splicing [GO:0008380]	pre-mRNA binding [GO:0036002]	nucleus [GO:0005634]	IRES-dependent viral translational initiation [GO:0075522];mRNA processing [GO:0006397];negative regulation of mRNA splicing, via spliceosome [GO:0048025];negative regulation of muscle cell differentiation [GO:0051148];regulation of alternative mRNA splicing, via spliceosome [GO:0000381];RNA splicing [GO:0008380];pre-mRNA binding [GO:0036002];nucleus [GO:0005634]
Q9TU23	Centrosomal protein of 290 kDa	cilium assembly [GO:0060271];positive regulation of intracellular protein transport [GO:0090316];positive regulation of transcription, DNA-templated [GO:0045893];protein transport [GO:0015031]		centriolar satellite [GO:0034451];centriole [GO:0005814];centrosome [GO:0005813];cytoplasmic vesicle [GO:0031410];cytosol [GO:0005829];MKS complex [GO:0036038];nucleus [GO:0005634];photoreceptor connecting cilium [GO:0032391]	cilium assembly [GO:0060271];positive regulation of intracellular protein transport [GO:0090316];positive regulation of transcription, DNA-templated [GO:0045893];protein transport [GO:0015031];centriolar satellite [GO:0034451];centriole [GO:0005814];centrosome [GO:0005813];cytoplasmic vesicle [GO:0031410];cytosol [GO:0005829];MKS complex [GO:0036038];nucleus [GO:0005634];photoreceptor connecting …
A3KMY6	ASAP3 protein	cell migration [GO:0016477]	GTPase activator activity [GO:0005096];metal ion binding [GO:0046872]	focal adhesion [GO:0005925]	cell migration [GO:0016477];GTPase activator activity [GO:0005096];metal ion binding [GO:0046872];focal adhesion [GO:0005925]
A6QQR2	Chloride channel protein		voltage-gated chloride channel activity [GO:0005247]	integral component of membrane [GO:0016021]	voltage-gated chloride channel activity [GO:0005247];integral component of membrane [GO:0016021]
A7E3B7	Chromosome 14 open reading frame 44
A7YWC2	CRY1 protein
A7Z030	ZNF521 protein		nucleic acid binding [GO:0003676]		nucleic acid binding [GO:0003676]
D5HSX1	cGMP-dependent protein kinase		ATP binding [GO:0005524];cGMP binding [GO:0030553];cGMP-dependent protein kinase activity [GO:0004692]		ATP binding [GO:0005524];cGMP binding [GO:0030553];cGMP-dependent protein kinase activity [GO:0004692]
E1B740	Small nuclear RNA activating complex polypeptide 4	snRNA transcription [GO:0009301]	DNA binding [GO:0003677]	snRNA-activating protein complex [GO:0019185]	snRNA transcription [GO:0009301];DNA binding [GO:0003677];snRNA-activating protein complex [GO:0019185]
E1B7C4	Dedicator of cytokinesis 10	regulation of cell migration [GO:0030334];small GTPase mediated signal transduction [GO:0007264]	guanyl-nucleotide exchange factor activity [GO:0005085]	cytosol [GO:0005829];nucleoplasm [GO:0005654]	regulation of cell migration [GO:0030334];small GTPase mediated signal transduction [GO:0007264];guanyl-nucleotide exchange factor activity [GO:0005085];cytosol [GO:0005829];nucleoplasm [GO:0005654]
E1B7K0	Galactosylceramidase	galactosylceramide catabolic process [GO:0006683]	galactosylceramidase activity [GO:0004336]		galactosylceramide catabolic process [GO:0006683];galactosylceramidase activity [GO:0004336]
E1B864	Integrin beta	amelogenesis [GO:0097186];autophagy [GO:0006914];cell motility [GO:0048870];cell-matrix adhesion [GO:0007160];digestive tract development [GO:0048565];hemidesmosome assembly [GO:0031581];integrin-mediated signaling pathway [GO:0007229];mesodermal cell differentiation [GO:0048333];nail development [GO:0035878];renal system development [GO:0072001];response to wounding [GO:0009611];skin development…	G-protein coupled receptor binding [GO:0001664];insulin-like growth factor I binding [GO:0031994];neuregulin binding [GO:0038132]	cell leading edge [GO:0031252];cell surface [GO:0009986];hemidesmosome [GO:0030056];integrin complex [GO:0008305]	amelogenesis [GO:0097186];autophagy [GO:0006914];cell motility [GO:0048870];cell-matrix adhesion [GO:0007160];digestive tract development [GO:0048565];hemidesmosome assembly [GO:0031581];integrin-mediated signaling pathway [GO:0007229];mesodermal cell differentiation [GO:0048333];nail development [GO:0035878];renal system development [GO:0072001];response to wounding [GO:0009611];skin development…
E1B933	Leucine rich repeats and IQ motif containing 1
E1B9Y2	Chromosome 9 open reading frame 172
E1BC48	Centrosomal protein 350	microtubule anchoring [GO:0034453]	microtubule binding [GO:0008017]	centriole [GO:0005814];centrosome [GO:0005813]	microtubule anchoring [GO:0034453];microtubule binding [GO:0008017];centriole [GO:0005814];centrosome [GO:0005813]
E1BCU2	Myomesin 3	actin filament organization [GO:0007015];sarcomere organization [GO:0045214];striated muscle contraction [GO:0006941];striated muscle myosin thick filament assembly [GO:0071688]	actin filament binding [GO:0051015];muscle alpha-actinin binding [GO:0051371];protein homodimerization activity [GO:0042803];structural constituent of muscle [GO:0008307];structural molecule activity conferring elasticity [GO:0097493]	M band [GO:0031430];muscle myosin complex [GO:0005859];Z disc [GO:0030018]	actin filament organization [GO:0007015];sarcomere organization [GO:0045214];striated muscle contraction [GO:0006941];striated muscle myosin thick filament assembly [GO:0071688];actin filament binding [GO:0051015];muscle alpha-actinin binding [GO:0051371];protein homodimerization activity [GO:0042803];structural constituent of muscle [GO:0008307];structural molecule activity conferring elasticity…
E1BDG9	10-formyltetrahydrofolate dehydrogenase	10-formyltetrahydrofolate catabolic process [GO:0009258];biosynthetic process [GO:0009058];one-carbon metabolic process [GO:0006730]	aldehyde dehydrogenase (NAD) activity [GO:0004029];formyltetrahydrofolate dehydrogenase activity [GO:0016155];hydroxymethyl-, formyl- and related transferase activity [GO:0016742]	mitochondrion [GO:0005739];nucleus [GO:0005634]	10-formyltetrahydrofolate catabolic process [GO:0009258];biosynthetic process [GO:0009058];one-carbon metabolic process [GO:0006730];aldehyde dehydrogenase (NAD) activity [GO:0004029];formyltetrahydrofolate dehydrogenase activity [GO:0016155];hydroxymethyl-, formyl- and related transferase activity [GO:0016742];mitochondrion [GO:0005739];nucleus [GO:0005634]
E1BF27	Solute carrier family 38 member 10	amino acid transmembrane transport [GO:0003333];bone development [GO:0060348]	amino acid transmembrane transporter activity [GO:0015171]	Golgi apparatus [GO:0005794];integral component of membrane [GO:0016021]	amino acid transmembrane transport [GO:0003333];bone development [GO:0060348];amino acid transmembrane transporter activity [GO:0015171];Golgi apparatus [GO:0005794];integral component of membrane [GO:0016021]
E1BG49	Centromere protein E	lateral attachment of mitotic spindle microtubules to kinetochore [GO:0099607];microtubule plus-end directed mitotic chromosome migration [GO:0099606];microtubule-based movement [GO:0007018];mitotic chromosome movement towards spindle pole [GO:0007079];mitotic spindle organization [GO:0007052];positive regulation of protein kinase activity [GO:0045860];regulation of mitotic metaphase/anaphase tra…	ATP binding [GO:0005524];ATPase activity [GO:0016887];kinetochore binding [GO:0043515];microtubule binding [GO:0008017];microtubule motor activity [GO:0003777]	condensed chromosome, centromeric region [GO:0000779];cytosol [GO:0005829];kinesin complex [GO:0005871];kinetochore [GO:0000776];kinetochore microtubule [GO:0005828];midbody [GO:0030496];mitotic spindle midzone [GO:1990023];nucleoplasm [GO:0005654]	lateral attachment of mitotic spindle microtubules to kinetochore [GO:0099607];microtubule plus-end directed mitotic chromosome migration [GO:0099606];microtubule-based movement [GO:0007018];mitotic chromosome movement towards spindle pole [GO:0007079];mitotic spindle organization [GO:0007052];positive regulation of protein kinase activity [GO:0045860];regulation of mitotic metaphase/anaphase tra…
E1BGK8	Histone-lysine N-methyltransferase, H3 lysine-79 specific	chromatin silencing at telomere [GO:0006348];DNA damage checkpoint [GO:0000077];DNA repair [GO:0006281];positive regulation of cell proliferation [GO:0008284];positive regulation of transcription by RNA polymerase II [GO:0045944];regulation of JAK-STAT cascade [GO:0046425];regulation of transcription regulatory region DNA binding [GO:2000677]	histone methyltransferase activity (H3-K79 specific) [GO:0031151]	chromosome, telomeric region [GO:0000781];nucleoplasm [GO:0005654];nucleus [GO:0005634];protein-containing complex [GO:0032991]	chromatin silencing at telomere [GO:0006348];DNA damage checkpoint [GO:0000077];DNA repair [GO:0006281];positive regulation of cell proliferation [GO:0008284];positive regulation of transcription by RNA polymerase II [GO:0045944];regulation of JAK-STAT cascade [GO:0046425];regulation of transcription regulatory region DNA binding [GO:2000677];histone methyltransferase activity (H3-K79 specific) […
E1BJU6	Spectrin repeat containing nuclear envelope family member 3	cytoskeletal anchoring at nuclear membrane [GO:0090286];establishment of protein localization to membrane [GO:0090150];regulation of cell shape [GO:0008360]	actin filament binding [GO:0051015]	integral component of membrane [GO:0016021];meiotic nuclear membrane microtubule tethering complex [GO:0034993];nuclear outer membrane [GO:0005640]	cytoskeletal anchoring at nuclear membrane [GO:0090286];establishment of protein localization to membrane [GO:0090150];regulation of cell shape [GO:0008360];actin filament binding [GO:0051015];integral component of membrane [GO:0016021];meiotic nuclear membrane microtubule tethering complex [GO:0034993];nuclear outer membrane [GO:0005640]
E1BK38	ATP binding cassette subfamily A member 13	lipid transport [GO:0006869]	ATP binding [GO:0005524];ATPase activity, coupled to transmembrane movement of substances [GO:0042626]	integral component of membrane [GO:0016021];intracellular membrane-bounded organelle [GO:0043231]	lipid transport [GO:0006869];ATP binding [GO:0005524];ATPase activity, coupled to transmembrane movement of substances [GO:0042626];integral component of membrane [GO:0016021];intracellular membrane-bounded organelle [GO:0043231]
E1BMG9	10-formyltetrahydrofolate dehydrogenase	10-formyltetrahydrofolate catabolic process [GO:0009258];biosynthetic process [GO:0009058];one-carbon metabolic process [GO:0006730]	aldehyde dehydrogenase (NAD) activity [GO:0004029];formyltetrahydrofolate dehydrogenase activity [GO:0016155];hydroxymethyl-, formyl- and related transferase activity [GO:0016742]	cytosol [GO:0005829]	10-formyltetrahydrofolate catabolic process [GO:0009258];biosynthetic process [GO:0009058];one-carbon metabolic process [GO:0006730];aldehyde dehydrogenase (NAD) activity [GO:0004029];formyltetrahydrofolate dehydrogenase activity [GO:0016155];hydroxymethyl-, formyl- and related transferase activity [GO:0016742];cytosol [GO:0005829]
E1BNG6	Family with sequence similarity 171 member A2			integral component of membrane [GO:0016021]	integral component of membrane [GO:0016021]
E1BPU9	Protein tyrosine phosphatase, receptor type M	homophilic cell adhesion via plasma membrane adhesion molecules [GO:0007156];negative regulation of angiogenesis [GO:0016525];negative regulation of endothelial cell migration [GO:0010596];negative regulation of endothelial cell proliferation [GO:0001937];neuron projection development [GO:0031175];positive regulation of blood vessel diameter [GO:0097755];protein dephosphorylation [GO:0006470];res…	cadherin binding [GO:0045296];identical protein binding [GO:0042802];transmembrane receptor protein tyrosine phosphatase activity [GO:0005001]	cell-cell adherens junction [GO:0005913];integral component of membrane [GO:0016021];lamellipodium [GO:0030027];perinuclear region of cytoplasm [GO:0048471];plasma membrane [GO:0005886]	homophilic cell adhesion via plasma membrane adhesion molecules [GO:0007156];negative regulation of angiogenesis [GO:0016525];negative regulation of endothelial cell migration [GO:0010596];negative regulation of endothelial cell proliferation [GO:0001937];neuron projection development [GO:0031175];positive regulation of blood vessel diameter [GO:0097755];protein dephosphorylation [GO:0006470];res…
E1BPW2	ELKS/RAB6-interacting/CAST family member 1	I-kappaB phosphorylation [GO:0007252]		IkappaB kinase complex [GO:0008385];presynaptic active zone [GO:0048786]	I-kappaB phosphorylation [GO:0007252];IkappaB kinase complex [GO:0008385];presynaptic active zone [GO:0048786]
E2GK10	Toll-like receptor 4	defense response to Gram-negative bacterium [GO:0050829];innate immune response [GO:0045087];macrophage activation [GO:0042116];MyD88-dependent toll-like receptor signaling pathway [GO:0002755];regulation of cytokine secretion [GO:0050707];toll-like receptor 4 signaling pathway [GO:0034142]	lipopolysaccharide receptor activity [GO:0001875];transmembrane signaling receptor activity [GO:0004888]	lipopolysaccharide receptor complex [GO:0046696]	defense response to Gram-negative bacterium [GO:0050829];innate immune response [GO:0045087];macrophage activation [GO:0042116];MyD88-dependent toll-like receptor signaling pathway [GO:0002755];regulation of cytokine secretion [GO:0050707];toll-like receptor 4 signaling pathway [GO:0034142];lipopolysaccharide receptor activity [GO:0001875];transmembrane signaling receptor activity [GO:0004888];li…
F1MBD5	Surfeit 2			nuclear speck [GO:0016607];nucleolus [GO:0005730];plasma membrane [GO:0005886]	nuclear speck [GO:0016607];nucleolus [GO:0005730];plasma membrane [GO:0005886]
F1MC03	Centrosomal protein 295			centrosome [GO:0005813]	centrosome [GO:0005813]
F1MC12	Synaptojanin-1	phosphatidylinositol dephosphorylation [GO:0046856];synaptic vesicle endocytosis [GO:0048488]	phosphatidylinositol phosphate 5-phosphatase activity [GO:0034595];RNA binding [GO:0003723]	cell [GO:0005623];synapse [GO:0045202]	phosphatidylinositol dephosphorylation [GO:0046856];synaptic vesicle endocytosis [GO:0048488];phosphatidylinositol phosphate 5-phosphatase activity [GO:0034595];RNA binding [GO:0003723];cell [GO:0005623];synapse [GO:0045202]
F1MGK8	Oncostatin M receptor	positive regulation of cell proliferation [GO:0008284]	growth factor binding [GO:0019838];oncostatin-M receptor activity [GO:0004924]	apical plasma membrane [GO:0016324];oncostatin-M receptor complex [GO:0005900]	positive regulation of cell proliferation [GO:0008284];growth factor binding [GO:0019838];oncostatin-M receptor activity [GO:0004924];apical plasma membrane [GO:0016324];oncostatin-M receptor complex [GO:0005900]
F1MIQ7	Coiled-coil domain containing 146			centriole [GO:0005814]	centriole [GO:0005814]
F1MJF9	Uncharacterized protein LOC511259
F1MJL4	Immediate early response 5	cellular response to heat [GO:0034605];positive regulation of cellular response to heat [GO:1900036];positive regulation of transcription by RNA polymerase II [GO:0045944];regulation of cell proliferation [GO:0042127]	identical protein binding [GO:0042802]	cytoplasm [GO:0005737];nucleus [GO:0005634];protein phosphatase type 2A complex [GO:0000159]	cellular response to heat [GO:0034605];positive regulation of cellular response to heat [GO:1900036];positive regulation of transcription by RNA polymerase II [GO:0045944];regulation of cell proliferation [GO:0042127];identical protein binding [GO:0042802];cytoplasm [GO:0005737];nucleus [GO:0005634];protein phosphatase type 2A complex [GO:0000159]
F1MKD3	Protocadherin alpha 11	cell adhesion [GO:0007155];cell-cell signaling [GO:0007267];homophilic cell adhesion via plasma membrane adhesion molecules [GO:0007156];nervous system development [GO:0007399]	calcium ion binding [GO:0005509]	integral component of plasma membrane [GO:0005887]	cell adhesion [GO:0007155];cell-cell signaling [GO:0007267];homophilic cell adhesion via plasma membrane adhesion molecules [GO:0007156];nervous system development [GO:0007399];calcium ion binding [GO:0005509];integral component of plasma membrane [GO:0005887]
F1MKU2	Chromobox 2	development of primary sexual characteristics [GO:0045137];negative regulation of transcription by RNA polymerase II [GO:0000122]	chromatin binding [GO:0003682];methylated histone binding [GO:0035064]	euchromatin [GO:0000791];heterochromatin [GO:0000792];nucleoplasm [GO:0005654];PRC1 complex [GO:0035102]	development of primary sexual characteristics [GO:0045137];negative regulation of transcription by RNA polymerase II [GO:0000122];chromatin binding [GO:0003682];methylated histone binding [GO:0035064];euchromatin [GO:0000791];heterochromatin [GO:0000792];nucleoplasm [GO:0005654];PRC1 complex [GO:0035102]
F1MP15	Protein Wnt	cell fate commitment [GO:0045165];chondrocyte differentiation [GO:0002062];negative regulation of canonical Wnt signaling pathway [GO:0090090];neuron differentiation [GO:0030182];positive regulation of cell migration [GO:0030335];positive regulation of fat cell differentiation [GO:0045600];Wnt signaling pathway [GO:0016055]	frizzled binding [GO:0005109]	cell surface [GO:0009986];extracellular space [GO:0005615];proteinaceous extracellular matrix [GO:0005578]	cell fate commitment [GO:0045165];chondrocyte differentiation [GO:0002062];negative regulation of canonical Wnt signaling pathway [GO:0090090];neuron differentiation [GO:0030182];positive regulation of cell migration [GO:0030335];positive regulation of fat cell differentiation [GO:0045600];Wnt signaling pathway [GO:0016055];frizzled binding [GO:0005109];cell surface [GO:0009986];extracellular spa…
F1MTR1	IQ motif containing GTPase activating protein 2	Arp2/3 complex-mediated actin nucleation [GO:0034314];regulation of GTPase activity [GO:0043087];thrombin-activated receptor signaling pathway [GO:0070493]	actin filament binding [GO:0051015];Arp2/3 complex binding [GO:0071933];calmodulin binding [GO:0005516];phosphatidylinositol-3,4,5-trisphosphate binding [GO:0005547];Rac GTPase binding [GO:0048365]	cell surface [GO:0009986];cytoplasm [GO:0005737];filamentous actin [GO:0031941];filopodium [GO:0030175];lamellipodium [GO:0030027];microvillus [GO:0005902]	Arp2/3 complex-mediated actin nucleation [GO:0034314];regulation of GTPase activity [GO:0043087];thrombin-activated receptor signaling pathway [GO:0070493];actin filament binding [GO:0051015];Arp2/3 complex binding [GO:0071933];calmodulin binding [GO:0005516];phosphatidylinositol-3,4,5-trisphosphate binding [GO:0005547];Rac GTPase binding [GO:0048365];cell surface [GO:0009986];cytoplasm [GO:00057…
F1MW83	Forkhead box K2	anatomical structure morphogenesis [GO:0009653];cell differentiation [GO:0030154]	magnesium ion binding [GO:0000287];RNA polymerase II proximal promoter sequence-specific DNA binding [GO:0000978];RNA polymerase II transcription factor activity, sequence-specific DNA binding [GO:0000981];transcriptional activator activity, RNA polymerase II proximal promoter sequence-specific DNA binding [GO:0001077]	nucleus [GO:0005634]	anatomical structure morphogenesis [GO:0009653];cell differentiation [GO:0030154];magnesium ion binding [GO:0000287];RNA polymerase II proximal promoter sequence-specific DNA binding [GO:0000978];RNA polymerase II transcription factor activity, sequence-specific DNA binding [GO:0000981];transcriptional activator activity, RNA polymerase II proximal promoter sequence-specific DNA binding [GO:00010…
F1MXH8	DMRT like family B with proline rich C-terminal 1		DNA binding transcription factor activity [GO:0003700];metal ion binding [GO:0046872];sequence-specific DNA binding [GO:0043565]	nucleus [GO:0005634]	DNA binding transcription factor activity [GO:0003700];metal ion binding [GO:0046872];sequence-specific DNA binding [GO:0043565];nucleus [GO:0005634]
F1MYU1	SWI/SNF related, matrix associated, actin dependent regulator of chromatin subfamily c member 1	animal organ morphogenesis [GO:0009887];ATP-dependent chromatin remodeling [GO:0043044];insulin receptor signaling pathway [GO:0008286];negative regulation of proteasomal ubiquitin-dependent protein catabolic process [GO:0032435];nucleosome disassembly [GO:0006337];positive regulation of transcription by RNA polymerase II [GO:0045944]	chromatin binding [GO:0003682];DNA binding [GO:0003677];protein N-terminus binding [GO:0047485]	cytoplasm [GO:0005737];nBAF complex [GO:0071565];npBAF complex [GO:0071564];nucleoplasm [GO:0005654];SWI/SNF complex [GO:0016514];XY body [GO:0001741]	animal organ morphogenesis [GO:0009887];ATP-dependent chromatin remodeling [GO:0043044];insulin receptor signaling pathway [GO:0008286];negative regulation of proteasomal ubiquitin-dependent protein catabolic process [GO:0032435];nucleosome disassembly [GO:0006337];positive regulation of transcription by RNA polymerase II [GO:0045944];chromatin binding [GO:0003682];DNA binding [GO:0003677];protei…
F1MZB5	Testis-expressed sequence 37 protein			cytoplasm [GO:0005737]	cytoplasm [GO:0005737]
F1N032	DENN domain containing 4C	cellular response to insulin stimulus [GO:0032869];protein localization to plasma membrane [GO:0072659]	Rab guanyl-nucleotide exchange factor activity [GO:0017112]	cytosol [GO:0005829];insulin-responsive compartment [GO:0032593];plasma membrane [GO:0005886];retromer complex [GO:0030904]	cellular response to insulin stimulus [GO:0032869];protein localization to plasma membrane [GO:0072659];Rab guanyl-nucleotide exchange factor activity [GO:0017112];cytosol [GO:0005829];insulin-responsive compartment [GO:0032593];plasma membrane [GO:0005886];retromer complex [GO:0030904]
F1N0T1	Laminin subunit gamma 3	astrocyte development [GO:0014002];cell morphogenesis involved in differentiation [GO:0000904];retina development in camera-type eye [GO:0060041];visual perception [GO:0007601]		basement membrane [GO:0005604]	astrocyte development [GO:0014002];cell morphogenesis involved in differentiation [GO:0000904];retina development in camera-type eye [GO:0060041];visual perception [GO:0007601];basement membrane [GO:0005604]
F1N3Y6	ATP binding cassette subfamily C member 3	drug transmembrane transport [GO:0006855];xenobiotic transport [GO:0042908]	ATP binding [GO:0005524];organic anion transmembrane transporter activity [GO:0008514];xenobiotic transmembrane transporting ATPase activity [GO:0008559]	basolateral plasma membrane [GO:0016323];integral component of plasma membrane [GO:0005887]	drug transmembrane transport [GO:0006855];xenobiotic transport [GO:0042908];ATP binding [GO:0005524];organic anion transmembrane transporter activity [GO:0008514];xenobiotic transmembrane transporting ATPase activity [GO:0008559];basolateral plasma membrane [GO:0016323];integral component of plasma membrane [GO:0005887]
F1N530	Uncharacterized protein
F1N5K2	Tubulin tyrosine ligase like 12	cellular protein modification process [GO:0006464]	ATP binding [GO:0005524]		cellular protein modification process [GO:0006464];ATP binding [GO:0005524]
F1N5U0	Alpha kinase 3		ATP binding [GO:0005524];protein serine/threonine kinase activity [GO:0004674]		ATP binding [GO:0005524];protein serine/threonine kinase activity [GO:0004674]
F1N757	Titin	actin filament organization [GO:0007015];sarcomere organization [GO:0045214];striated muscle contraction [GO:0006941];striated muscle myosin thick filament assembly [GO:0071688]	actin filament binding [GO:0051015];ATP binding [GO:0005524];muscle alpha-actinin binding [GO:0051371];protein kinase activity [GO:0004672];structural constituent of muscle [GO:0008307];structural molecule activity conferring elasticity [GO:0097493]	M band [GO:0031430];muscle myosin complex [GO:0005859];Z disc [GO:0030018]	actin filament organization [GO:0007015];sarcomere organization [GO:0045214];striated muscle contraction [GO:0006941];striated muscle myosin thick filament assembly [GO:0071688];actin filament binding [GO:0051015];ATP binding [GO:0005524];muscle alpha-actinin binding [GO:0051371];protein kinase activity [GO:0004672];structural constituent of muscle [GO:0008307];structural molecule activity confer…
F2Z4E2	Uncharacterized protein		metallopeptidase activity [GO:0008237];peptidyl-dipeptidase activity [GO:0008241]	membrane [GO:0016020]	metallopeptidase activity [GO:0008237];peptidyl-dipeptidase activity [GO:0008241];membrane [GO:0016020]
F4YD22	Peroxiredoxin 1	cell redox homeostasis [GO:0045454]	peroxiredoxin activity [GO:0051920]	cell [GO:0005623]	cell redox homeostasis [GO:0045454];peroxiredoxin activity [GO:0051920];cell [GO:0005623]
G3MYL3	Uncharacterized protein	positive regulation of transcription by RNA polymerase II [GO:0045944]	DNA binding transcription factor activity [GO:0003700];transcription regulatory region DNA binding [GO:0044212]		positive regulation of transcription by RNA polymerase II [GO:0045944];DNA binding transcription factor activity [GO:0003700];transcription regulatory region DNA binding [GO:0044212]
G3N0M1	Uncharacterized protein
G3N1Q6	Uncharacterized protein	potassium ion transmembrane transport [GO:0071805];stabilization of membrane potential [GO:0030322]	potassium ion leak channel activity [GO:0022841]	integral component of plasma membrane [GO:0005887]	potassium ion transmembrane transport [GO:0071805];stabilization of membrane potential [GO:0030322];potassium ion leak channel activity [GO:0022841];integral component of plasma membrane [GO:0005887]
G3N1V7	Kelch like family member 34	protein ubiquitination [GO:0016567]		Cul3-RING ubiquitin ligase complex [GO:0031463]	protein ubiquitination [GO:0016567];Cul3-RING ubiquitin ligase complex [GO:0031463]
G3N2P6	Uncharacterized protein		structural molecule activity [GO:0005198]	intermediate filament [GO:0005882]	structural molecule activity [GO:0005198];intermediate filament [GO:0005882]
G3X8E4	BCL6 corepressor	heart development [GO:0007507];histone H2A monoubiquitination [GO:0035518];negative regulation of bone mineralization [GO:0030502];negative regulation of histone H3-K36 methylation [GO:0000415];negative regulation of histone H3-K4 methylation [GO:0051572];negative regulation of tooth mineralization [GO:0070171];negative regulation of transcription by RNA polymerase II [GO:0000122];odontogenesis […	heat shock protein binding [GO:0031072];histone deacetylase binding [GO:0042826];RNA polymerase II regulatory region sequence-specific DNA binding [GO:0000977];transcription corepressor activity [GO:0003714];transcription factor binding [GO:0008134];ubiquitin-protein transferase activity [GO:0004842]	PcG protein complex [GO:0031519]	heart development [GO:0007507];histone H2A monoubiquitination [GO:0035518];negative regulation of bone mineralization [GO:0030502];negative regulation of histone H3-K36 methylation [GO:0000415];negative regulation of histone H3-K4 methylation [GO:0051572];negative regulation of tooth mineralization [GO:0070171];negative regulation of transcription by RNA polymerase II [GO:0000122];odontogenesis […
H9KUU9	Serine/threonine-protein kinase VRK1	Golgi disassembly [GO:0090166];protein autophosphorylation [GO:0046777]	ATP binding [GO:0005524];histone kinase activity (H3-S10 specific) [GO:0035175];histone kinase activity (H3-T3 specific) [GO:0072354];nucleosomal histone binding [GO:0031493];protein kinase binding [GO:0019901]	cytosol [GO:0005829];Golgi stack [GO:0005795];integral component of membrane [GO:0016021];nucleolus [GO:0005730];nucleoplasm [GO:0005654]	Golgi disassembly [GO:0090166];protein autophosphorylation [GO:0046777];ATP binding [GO:0005524];histone kinase activity (H3-S10 specific) [GO:0035175];histone kinase activity (H3-T3 specific) [GO:0072354];nucleosomal histone binding [GO:0031493];protein kinase binding [GO:0019901];cytosol [GO:0005829];Golgi stack [GO:0005795];integral component of membrane [GO:0016021];nucleolus [GO:0005730];nuc…
J7ILS9	Necdin	negative regulation of cell proliferation [GO:0008285];neuron development [GO:0048666]			negative regulation of cell proliferation [GO:0008285];neuron development [GO:0048666]
L8HNL9	Uncharacterized protein
L8HQH4	Alpha-2-HS-glycoprotein		cysteine-type endopeptidase inhibitor activity [GO:0004869]	extracellular space [GO:0005615]	cysteine-type endopeptidase inhibitor activity [GO:0004869];extracellular space [GO:0005615]
L8HQR6	Galectin-3-binding protein		scavenger receptor activity [GO:0005044]	membrane [GO:0016020]	scavenger receptor activity [GO:0005044];membrane [GO:0016020]
L8HQS5	E3 ubiquitin-protein ligase UHRF1		ligase activity [GO:0016874];metal ion binding [GO:0046872]	nucleus [GO:0005634]	ligase activity [GO:0016874];metal ion binding [GO:0046872];nucleus [GO:0005634]
L8HRU8	Eukaryotic translation initiation factor 4E transporter		translation initiation factor activity [GO:0003743]		translation initiation factor activity [GO:0003743]
L8HTQ8	Kinesin-like protein KIF13B	microtubule-based movement [GO:0007018]	ATP binding [GO:0005524];microtubule binding [GO:0008017];microtubule motor activity [GO:0003777]		microtubule-based movement [GO:0007018];ATP binding [GO:0005524];microtubule binding [GO:0008017];microtubule motor activity [GO:0003777]
L8HUC4	Polycystic kidney disease protein 1-like 2		carbohydrate binding [GO:0030246]		carbohydrate binding [GO:0030246]
L8HWV2	Ankyrin repeat and FYVE domain-containing protein 1		metal ion binding [GO:0046872]		metal ion binding [GO:0046872]
L8HY85	Golgi SNAP receptor complex member 2	protein transport [GO:0015031];vesicle-mediated transport [GO:0016192]	SNAP receptor activity [GO:0005484]	Golgi apparatus [GO:0005794];integral component of membrane [GO:0016021]	protein transport [GO:0015031];vesicle-mediated transport [GO:0016192];SNAP receptor activity [GO:0005484];Golgi apparatus [GO:0005794];integral component of membrane [GO:0016021]
L8HZL3	Methyltransferase-like protein		methyltransferase activity [GO:0008168]		methyltransferase activity [GO:0008168]
L8I2S0	Signal transducer and activator of transcription	transcription, DNA-templated [GO:0006351]	DNA binding [GO:0003677];DNA binding transcription factor activity [GO:0003700];signal transducer activity [GO:0004871]	cytoplasm [GO:0005737];nucleus [GO:0005634]	transcription, DNA-templated [GO:0006351];DNA binding [GO:0003677];DNA binding transcription factor activity [GO:0003700];signal transducer activity [GO:0004871];cytoplasm [GO:0005737];nucleus [GO:0005634]
L8I6A9	DNA primase		DNA primase activity [GO:0003896]		DNA primase activity [GO:0003896]
L8I6D8	Brother of CDO	axon guidance [GO:0007411];positive regulation of myoblast differentiation [GO:0045663];smoothened signaling pathway [GO:0007224]		integral component of plasma membrane [GO:0005887]	axon guidance [GO:0007411];positive regulation of myoblast differentiation [GO:0045663];smoothened signaling pathway [GO:0007224];integral component of plasma membrane [GO:0005887]
L8I9N9	Coiled-coil domain-containing protein 37
L8I9P1	HEAT repeat-containing protein 5B
L8IAB1	Uncharacterized protein
L8IB66	Chromosome-associated kinesin KIF4A	microtubule-based movement [GO:0007018]	ATP binding [GO:0005524];microtubule binding [GO:0008017];microtubule motor activity [GO:0003777]		microtubule-based movement [GO:0007018];ATP binding [GO:0005524];microtubule binding [GO:0008017];microtubule motor activity [GO:0003777]
L8IBE2	AP-3 complex subunit beta	intracellular protein transport [GO:0006886];vesicle-mediated transport [GO:0016192]		AP-3 adaptor complex [GO:0030123];clathrin adaptor complex [GO:0030131]	intracellular protein transport [GO:0006886];vesicle-mediated transport [GO:0016192];AP-3 adaptor complex [GO:0030123];clathrin adaptor complex [GO:0030131]
L8IBW4	FtsJ methyltransferase domain-containing protein 1		methyltransferase activity [GO:0008168]		methyltransferase activity [GO:0008168]
L8ICG5	T-complex-associated testis-expressed protein 1
L8IEG6	Transferrin receptor protein 1	cellular iron ion homeostasis [GO:0006879]	transferrin receptor activity [GO:0004998];transferrin transmembrane transporter activity [GO:0033570]	integral component of membrane [GO:0016021];plasma membrane [GO:0005886]	cellular iron ion homeostasis [GO:0006879];transferrin receptor activity [GO:0004998];transferrin transmembrane transporter activity [GO:0033570];integral component of membrane [GO:0016021];plasma membrane [GO:0005886]
L8IHL2	Uncharacterized protein
L8IJC6	Coiled-coil domain-containing protein 114
L8IK74	OTU domain-containing protein 7B		DNA binding [GO:0003677];zinc ion binding [GO:0008270]		DNA binding [GO:0003677];zinc ion binding [GO:0008270]
L8IKB6	Uncharacterized protein	defense response to virus [GO:0051607]	signal transducer activity [GO:0004871]	mitochondrion [GO:0005739]	defense response to virus [GO:0051607];signal transducer activity [GO:0004871];mitochondrion [GO:0005739]
L8INK7	Desmoplakin	cell-cell adhesion [GO:0098609]	cell adhesion molecule binding [GO:0050839]	cell junction [GO:0030054];cytoskeleton [GO:0005856]	cell-cell adhesion [GO:0098609];cell adhesion molecule binding [GO:0050839];cell junction [GO:0030054];cytoskeleton [GO:0005856]
L8INZ9	Apolipoprotein B-100 receptor	lipid transport [GO:0006869]	lipoprotein particle receptor activity [GO:0030228]		lipid transport [GO:0006869];lipoprotein particle receptor activity [GO:0030228]
L8IPB4	Skin-specific protein 32
L8IPS4	Calpain-7-like protein		calcium-dependent cysteine-type endopeptidase activity [GO:0004198];heme binding [GO:0020037];oxygen binding [GO:0019825]	intracellular [GO:0005622]	calcium-dependent cysteine-type endopeptidase activity [GO:0004198];heme binding [GO:0020037];oxygen binding [GO:0019825];intracellular [GO:0005622]
L8IQT6	Myomesin-1
L8IRH8	Selenocysteine insertion sequence-binding protein 2-like protein
L8IS94	Leucine-rich repeat and IQ domain-containing protein 3
L8IST5	Golgin subfamily A member 3	spermatogenesis [GO:0007283]		extrinsic component of Golgi membrane [GO:0090498]	spermatogenesis [GO:0007283];extrinsic component of Golgi membrane [GO:0090498]
L8IVQ9	LIM and senescent cell antigen-like-containing domain protein	cell-cell junction organization [GO:0045216]	metal ion binding [GO:0046872]	focal adhesion [GO:0005925];plasma membrane [GO:0005886]	cell-cell junction organization [GO:0045216];metal ion binding [GO:0046872];focal adhesion [GO:0005925];plasma membrane [GO:0005886]
L8IWS0	Rho guanine nucleotide exchange factor 9	regulation of Rho protein signal transduction [GO:0035023]	Rho guanyl-nucleotide exchange factor activity [GO:0005089]		regulation of Rho protein signal transduction [GO:0035023];Rho guanyl-nucleotide exchange factor activity [GO:0005089]
L8IXH7	Disks large-associated protein 2	neuron-neuron synaptic transmission [GO:0007270]			neuron-neuron synaptic transmission [GO:0007270]
L8IY54	Taste receptor type 1 member 3		G-protein coupled receptor activity [GO:0004930]	integral component of membrane [GO:0016021];plasma membrane [GO:0005886]	G-protein coupled receptor activity [GO:0004930];integral component of membrane [GO:0016021];plasma membrane [GO:0005886]
L8IZA0	Microtubule-associated protein	central nervous system neuron development [GO:0021954];microtubule bundle formation [GO:0001578]	tubulin binding [GO:0015631]	cytoplasm [GO:0005737];microtubule [GO:0005874]	central nervous system neuron development [GO:0021954];microtubule bundle formation [GO:0001578];tubulin binding [GO:0015631];cytoplasm [GO:0005737];microtubule [GO:0005874]
L8J0D9	Peptidyl-prolyl cis-trans isomerase G	protein folding [GO:0006457]	peptidyl-prolyl cis-trans isomerase activity [GO:0003755]		protein folding [GO:0006457];peptidyl-prolyl cis-trans isomerase activity [GO:0003755]
L8J0I1	Renin receptor		signaling receptor activity [GO:0038023]	integral component of membrane [GO:0016021]	signaling receptor activity [GO:0038023];integral component of membrane [GO:0016021]
L8J0Y2	Chloride channel protein		voltage-gated chloride channel activity [GO:0005247]	integral component of membrane [GO:0016021]	voltage-gated chloride channel activity [GO:0005247];integral component of membrane [GO:0016021]
L8J3Z5	PDZ domain-containing protein 2
M5FMV4	Uncharacterized protein
O46738	MHC class I heavy chain
Q1RMP1	ADP ribosylation factor like GTPase 10		GTP binding [GO:0005525]	integral component of membrane [GO:0016021];intracellular [GO:0005622]	GTP binding [GO:0005525];integral component of membrane [GO:0016021];intracellular [GO:0005622]
Q2KIB8	POU domain protein	brain development [GO:0007420];regulation of transcription by RNA polymerase II [GO:0006357];transcription, DNA-templated [GO:0006351]	DNA binding transcription factor activity [GO:0003700];sequence-specific DNA binding [GO:0043565]	nucleus [GO:0005634]	brain development [GO:0007420];regulation of transcription by RNA polymerase II [GO:0006357];transcription, DNA-templated [GO:0006351];DNA binding transcription factor activity [GO:0003700];sequence-specific DNA binding [GO:0043565];nucleus [GO:0005634]
Q2TA27	Uncharacterized protein MGC134093	signal transduction [GO:0007165]			signal transduction [GO:0007165]
Q32PI7	Sodium/nucleoside cotransporter		nucleoside [GO:0005415]	integral component of plasma membrane [GO:0005887]	nucleoside [GO:0005415];integral component of plasma membrane [GO:0005887]
Q5EAA6	Engulfment and cell motility 1	actin cytoskeleton organization [GO:0030036];cell migration [GO:0016477];phagocytosis [GO:0006909]			actin cytoskeleton organization [GO:0030036];cell migration [GO:0016477];phagocytosis [GO:0006909]
Q7M2Y2	Tumor-specific transplantation antigen P198 homolog p23	translation [GO:0006412]	structural constituent of ribosome [GO:0003735]	large ribosomal subunit [GO:0015934]	translation [GO:0006412];structural constituent of ribosome [GO:0003735];large ribosomal subunit [GO:0015934]
X5EYG3	Vasa		ATP binding [GO:0005524];helicase activity [GO:0004386];nucleic acid binding [GO:0003676]		ATP binding [GO:0005524];helicase activity [GO:0004386];nucleic acid binding [GO:0003676]
